1     **Altered drug metabolism and increased susceptibility to fatty liver disease in an**  
2                     **inducible liver-specific mouse model of myotonic dystrophy**

3  
4     Zac Dewald<sup>1</sup>, Ullas V. Chembazhi<sup>1</sup>, Andrew Gupta<sup>1</sup>, and Auinash Kalsotra<sup>1,2,3§</sup>

5     <sup>1</sup>Department of Biochemistry, <sup>2</sup>Cancer Center@Illinois, and <sup>3</sup>Carl R. Woese Institute for  
6     Genomic Biology, University of Illinois, Urbana-Champaign, IL, United States.

7     §To whom correspondence should be addressed. E-mail: [kalsotra@illinois.edu](mailto:kalsotra@illinois.edu)

8     Phone: 1-217-300-7654

9     Fax: 1-217-244-5858

10    **Running title:** Fatty liver disease and drug metabolism defects in DM1

11    **Keywords:** Myotonic dystrophy type 1, Alternative splicing, RNA toxicity, Mouse model,  
12    Fatty liver disease, Drug metabolism

## 13 **Abstract**

14           Myotonic Dystrophy type 1 (DM1) is multi-systemic muscular dystrophy, affecting 1 in  
15 3000 people, characterized by muscle wasting, myotonia, cardiac and gastrointestinal  
16 abnormalities and cognitive impairment, among other symptoms. DM1 is caused by a  
17 (CTG)<sub>n</sub> repeat expansion in the 3' UTR of the ubiquitously expressed gene *DMPK*. The  
18 (CUG)<sub>n</sub> containing RNAs resulting from the transcription of this diseased *DMPK* gene  
19 aggregate in the nucleus, forming foci which sequester muscleblind-like (MBNL) family  
20 proteins, a group of splicing factors that play significant roles in the juvenile-to-adult  
21 development of many tissues. Recent studies show that DM1 patients have increased  
22 susceptibility toward glucose intolerance, non-alcoholic fatty liver disease (NAFLD), and  
23 metabolic syndrome. Furthermore, DM1 patients are abnormally sensitive to a wide range of  
24 analgesics and anesthetics, with complications ranging from prolonged anesthesia recovery  
25 to heightened pulmonary dysfunction. These findings suggest a predisposition for liver  
26 damage and dysfunction in DM1 patients; however, this possibility has gone uninvestigated.  
27 To understand the effects of DM1 in the liver, we generated a hepatocyte-specific DM1  
28 mouse model in which we can induce the expression of CUG containing RNA, specifically in  
29 the liver. Through these mice, we demonstrate that the expression of the toxic RNA in  
30 hepatocytes sequesters MBNL proteins, causing a reduction in mature hepatocellular  
31 activity, however, we find that, in contrast to other tissues, loss of MBNL1 activity only  
32 reproduces a small portion of the transcriptome changes in DM1 afflicted hepatocytes. We  
33 characterized the transcriptomic changes driven by DM1 in the liver and show that these lead  
34 to changes in hepatocellular morphology, inflammation, and necrosis, as well as excessive  
35 lipid accumulation and fatty liver disease. We further demonstrate that DM1 mice livers are

36 defective in drug metabolism and clearance, and when challenged, exhibit marked  
37 impairment against zoxazolamine-induced paralysis and acetaminophen-induced  
38 hepatotoxicity. Together, these results reveal that the expression of CUG repeat containing  
39 RNA disrupts the normal hepatic functions and predisposes the liver to injury, fatty liver  
40 disease, and drug clearance pathologies that may jeopardize the health of DM1 patients and  
41 complicate the treatment of DM1.

42

43

## 44 Introduction

45 Myotonic Dystrophy Type 1 (DM1) is an autosomal dominant disease and the second  
46 most common form of muscular dystrophy, affecting more than one in three thousand adults  
47 in North America (Ashizawa et al., 2018; Harper, 2003). The cardinal symptoms of DM1  
48 include myotonia, debilitating muscle weakness and wasting, abnormal heart function, and  
49 excessive fatigue (Ashizawa et al., 2018; Harper, 2003). Despite DM1's initial  
50 characterization as a form of muscular dystrophy, the disease is genuinely multisystemic;  
51 patients report various gastrointestinal, metabolic, and neurological dysfunctions, such as  
52 excessive daytime sleepiness and insulin resistance (Ashizawa et al., 2018; Heatwole et al.,  
53 2012).

54 DM1 is caused by a (CTG)<sub>n</sub> repeat expansion in the 3' UTR of a ubiquitously  
55 expressed gene Dystrophia Myotonica protein kinase (*DMPK*) (Brook et al., 1992; Day &  
56 Ranum, 2005; J. E. Lee & Cooper, 2009). The (CUG)<sub>n</sub> containing RNAs resulting from the  
57 transcription of the diseased *DMPK* gene form hairpin secondary structures and aggregate  
58 in the nucleus, forming discrete RNA foci (J. E. Lee & Cooper, 2009; Mankodi, 2000). These  
59 foci interact with and sequester the muscle blind-like (MBNL) family of splicing factors (Jiang  
60 et al., 2004; Miller, 2002). MBNL proteins affect many developmentally-regulated alternative  
61 splicing and polyadenylation decisions in various tissues throughout the process of  
62 maturation towards adulthood; thus, their loss-of-activity in DM1 shifts splicing of target pre-  
63 mRNAs towards fetal-like patterns, inducing specific features of the disease (Chau &  
64 Kalsotra, 2015; Ho et al., 2004; Lin et al., 2006; Wang et al., 2012). This reversal of  
65 transcriptomic patterning from fully mature to a more immature state causes many of the  
66 disease symptoms to become more prevalent later in life, with diagnosis often occurring in

67 the mid to late 30's (Lin et al., 2006; Philips et al., 1998; Yum et al., 2017). However, diagnosis  
68 typically occurs only after the development of significant muscular or neurological symptoms,  
69 which allows for the subtle and long-term consequences of the disease to go un-managed  
70 (Turner & Hilton-Jones, 2010).

71 DM1 patients are abnormally sensitive to a wide range of anesthetics and muscle  
72 relaxants, resulting in prolonged anesthesia recovery, heightened pulmonary dysfunction,  
73 and in some cases, death (Campbell et al., 2010; Harper, 2003; Mathieu et al., 1997). Often,  
74 these symptoms are attributed to the disruption of neurological and muscular function, which  
75 is a hallmark of DM1. However, within the last twenty years, several studies have  
76 demonstrated that DM1 patients have an increased susceptibility to non-alcoholic fatty liver  
77 disease (NAFLD), metabolic syndrome, and liver damage (Achiron et al., 1998; Bhardwaj &  
78 Duchini, 2010; John Herbick, 2013; Shieh et al., 2010). These studies would suggest  
79 inappropriate liver function and a predisposition for liver injury in DM1 patients. A  
80 malfunctioning liver could also help explain the sensitivity to anesthetic treatment; a liver that  
81 is unable to provide adequate metabolism of xenobiotic material would prolong the clearance  
82 time for many drugs and may increase their potency. Minor malfunctions in liver response to  
83 metabolic signaling and drug metabolism may indeed be a frequent occurrence in DM1  
84 patients; however, none have investigated this possibility.

85 Here we sought to determine what effects DM1 might have upon liver function and  
86 overall liver health. Utilizing two previously established mouse lines, we generated a mouse  
87 model in which we induced the expression of (CUG)<sub>n</sub> repeat-containing RNA, specifically in  
88 the hepatocytes within the liver (J. Lee et al., 2019; Morriss et al., 2018; Xu et al., 2005).  
89 Utilizing a combination of biochemical, molecular, and computational methods, we found that

90 expression of the toxic (CUG)<sub>n</sub> RNA triggered global gene expression and RNA processing  
91 defects in the hepatocytes. These transcriptome defects led to a variety of physiological and  
92 cellular pathologies, including accumulation of lipids and fatty liver, increased susceptibility  
93 to insult and injury, and misregulation of xenobiotic metabolism. However, in contrast to some  
94 other tissues, it appears that the ablation of MBNL1 activity alone is not sufficient to replicate  
95 the effects of DM1 within the liver. Thus, our results reveal that DM1 disrupts the normal  
96 hepatic functions and predisposes the liver to fatty liver disease and injury and confirms the  
97 need for increased research into the effects of DM1 in non-traditional tissues, including the  
98 liver.

99

100

## 101 **Results**

### 102 **A hepatocyte-specific murine model of DM1 recapitulates the molecular features** 103 **of the disease in the liver**

104

105 The pathogenic mechanism of DM1 is comprised of three primary parts: i) the  
106 transcription and production of a long CUG repeat-containing RNA, ii) the accumulation  
107 of this RNA into nuclear foci, and iii) the sequestration of MBNL proteins into such RNA  
108 foci, which results in the decrease of MBNL directed RNA processing activities  
109 (Machuca-Tzili et al., 2005; Scotti & Swanson, 2016; Wheeler & Thornton, 2007). To  
110 study the effects of DM1 within the liver, we generated a bi-transgenic murine model by  
111 combining two existing mice models. First, is the tetracycline-inducible mouse model  
112 with a *DMPK* transgene containing the last five exons of human *DMPK* and 960  
113 interrupted CTG repeats (labeled here as CUG960i RNA), developed by Cooper and  
114 colleagues (Morriss et al., 2018). The second model utilizes the expression of a reverse  
115 tetracycline trans-activator (rtTA) driven by the apolipoprotein E (ApoE) promoter, which  
116 is highly expressed in the hepatocytes of the liver (Xu et al., 2005). By crossing these  
117 two mice models we generated a double homozygous bi-transgenic line that allows for  
118 conditional, doxycycline (Dox)-dependent expression of the CUG960i RNA specifically  
119 in the liver tissue, thus allowing the study of DM1 disease in the liver (**Fig. 1A**). From  
120 now on this bi-transgenic model is referred to as the DM1 liver model, and the control  
121 mice for this model contain only the homozygous ApoE-rtTA allele.

122 To mimic the DM1 conditions seen in human patients, we induced the disease in  
123 newborn pups by feeding the mother a diet supplemented with 2 g of Dox per kg of

124 chow. Once weaned, mice then continued a Dox diet at a lower dose of 0.1 g/kg until  
125 they reached adulthood, occurring roughly at nine weeks (**Fig. 1B**). At eight weeks of  
126 age, mice fasted for 20-22 hours were administered a glucose tolerance test (GTT),  
127 where mice received 2 mg of glucose per g of body weight via intraperitoneal injection  
128 (IP) and glucose levels were monitored periodically for 2 hours.

129 To confirm the appropriate expression of the CUG960i RNA and the formation of toxic  
130 RNA/RNA binding protein (Rbp) foci, we utilized fluorescent in-situ hybridization and  
131 immunofluorescence (FISH-IF) with probes targeting the CUG repeat sequence within  
132 the RNA (**Fig. 1C**). Bright puncta of condensed CUG RNA were seen in the nuclei of  
133 most hepatocytes, and, notably, these RNA foci overlapped with a fluorescent signal  
134 when either anti-MBNL1 or MBNL2 antibodies were used, indicating that the toxic CUG  
135 RNAs have successfully sequestered the MBNL proteins. The MBNL containing RNA  
136 foci only occurred in the DM1 mice livers and not in the ApoE-rtTA control mice livers.  
137 Quantification of the CUG960i/MBNL foci indicated that over 80% of hepatocyte nuclei  
138 in the DM1 mice contain at least one RNA focus, ensuring the uniformly distributed  
139 expression of both transgenes (**Fig. 1D**). The appearance of RNA foci was Dox-  
140 dependent — when mice with both the ApoE-rtTA and CUG960i alleles are either not  
141 fed Dox or if the Dox diet was withdrawn for a week or more, the RNA foci were  
142 undetectable. The distribution of CUG960i RNA foci per nuclei followed a Poisson curve,  
143 with most hepatocytes having one to three foci and a small number of hepatocytes  
144 exceeding ten plus foci within a single nucleus (**Fig. 1E**).

145 Finally, to assay the amount of toxic RNA produced, CUG960i transgene expression  
146 was quantified by extracting RNA from whole livers and performing quantitative PCR



147 (qPCR) with primers located in the final exon of *DMPK* transcript. DM1 liver mice  
148 expressed the CUG960i transgene at levels near those of  $\beta$ -actin transcripts within the  
149 liver, compared to ApoE-rtTA control mice, which showed no evidence of CUG960i  
150 expression (**Fig. 1F**). A comparison of CUG960i RNA within isolated hepatocytes  
151 versus that of the whole liver confirmed that the transgene's expression occurs primarily  
152 within hepatocytes (**Fig S1A, B**). Livers of the bi-transgenic mice not fed Dox showed  
153 little evidence of CUG960i expression, confirming that Dox must be fed to these animals  
154 to express sufficient amounts of toxic RNA. (**Fig. 1F**).

155

## 156 **Expression of CUG960i RNA induces global transcriptomic changes within** 157 **hepatocytes**

158

159 Upon establishing that the DM1 liver model reproduces the molecular features of the  
160 disease, we prepared total RNAs from purified hepatocytes isolated from the ApoE-rtTA  
161 controls and DM1 afflicted mice livers that were fed a 2.0 g/kg Dox-supplemented diet  
162 for nine weeks. We next tested the splicing patterns of MBNL1-regulated exons within  
163 these RNA samples using end-point reverse-transcription PCR (RT-PCR) assays. The  
164 DM1 mouse livers consistently reproduced an alternative splicing pattern that  
165 significantly deviates from the control samples (**Fig. 2A**), confirming that like the muscle  
166 and brain tissues, the expanded CUG repeat containing RNA of DM1 also induces  
167 splicing defects in the liver. We performed high-resolution RNA-sequencing of poly(A)  
168 selected RNA from the purified hepatocyte samples to further explore the genome-wide  
169 RNA processing defects in DM1 afflicted livers. Analysis of the resulting data revealed

170 widespread changes in the DM1 hepatocyte transcriptome, with significant changes in  
171 mRNA abundance, splicing, and alternative polyadenylation (ApA) (**Fig. 2B**). Focusing  
172 upon the gene expression, inducing DM1 within the murine liver changed the mRNA  
173 abundance of 760 transcripts at a 2-fold level or higher, 516 upregulated and 244  
174 downregulated compared to control livers (**Fig. 2C**).

175 As the MBNL proteins are most known for regulating alternative splicing events, it is not  
176 surprising that nearly one thousand splicing events change upon the expression of the  
177 toxic DM1 RNA within the liver. Of the splicing 928 splicing events which demonstrate a  
178 greater than 10% change in PSI (Percent Spliced In) within the DM1 liver, every form of  
179 alternative splicing is represented, with most of the events falling under the category of  
180 cassette exons, with 35 of these events showing a  $\Delta$ PSI change of 50% or higher (**Fig.**  
181 **2D, S1C**). Forty-one of these alternatively spliced events were validated by RT-PCR;  
182 the comparison showed a high consistency between the RNA-seq and RT-PCR results  
183 (**Fig. 2F**).

184 Gene ontology analysis of the transcripts with dysregulation in abundance, splicing or  
185 ApA revealed enrichments in unique functional categories. Transcripts changing in  
186 abundance were enriched in glucose, lipid and energy-related metabolism, as well as  
187 oxo-reductase and cytochrome p450 activity (**Fig. 2I, Table 1**)(Huang et al., 2007,  
188 2009). The transcripts with altered splicing patterns were however enriched in mRNA  
189 processing, signal transduction and protein phosphorylation. A substantial number of  
190 transcripts encoding proteins associated with the immune response, specifically  
191 response to viral and bacterial infection, exhibited defects in both overall abundance  
192 and splicing (**Fig. 2J, Table 2**). Transcripts with misregulated ApA events, much like

193 misregulated splicing events, were enriched in nucleotide binding, protein binding and  
194 transport-related functions.

195 The proposed molecular mechanism of DM1 entails the disruption of MBNL protein  
196 activities, resulting in a transcriptomic shift away from the normal state of healthy adult  
197 tissue and towards an immature state in the muscles, heart, and neurons (Chau &  
198 Kalsotra, 2015; Scotti & Swanson, 2015; Sobczak et al., 2014; Wang et al., 2019;  
199 Wheeler & Thornton, 2007). To test whether this pattern holds within the liver, we  
200 isolated hepatocytes from *Mbnl1*<sup>ΔE3/ΔE3</sup> (*Mbnl1* knockout) mice at ten weeks of age and  
201 corresponding littermate wild-type controls (Kanadia, 2003). Again RT-PCR splice  
202 assays, and RNA-seq were performed on the poly(A) selected RNAs purified from  
203 freshly isolated wildtype and *Mbnl1* KO hepatocyte samples and the results compared  
204 to the DM1 liver and ApoE control samples as previously mentioned. Notably, the DM1  
205 liver samples showed a shift in splicing away from controls in the same direction as the  
206 *Mbnl1* KO samples (**Fig. 2F, S1D, E**). However, it is also interesting to note that the  
207 DM1 samples often demonstrate a more significant deviation from “normal” than the  
208 *Mbnl1* KO samples.

209 As MBNL proteins play a role in regulating mature liver development and function, we  
210 compared the transcriptomic changes in the DM1 liver versus those changing in either  
211 the *Mbnl1* KO model or during postnatal liver maturation (Bangru et al., 2018). By  
212 comparing alternatively spliced transcripts that change in either the context of DM1,  
213 *Mbnl1* knockout, or in liver maturation, we found that only about 25% of the events  
214 changing in DM1 were regulated by MBNL1 (**Fig. 2G, H**). Of note, whereas only a  
215 modest portion of misspliced events in DM1 were developmentally regulated, over 50%

216 of transcripts changing in abundance in the DM1 liver were also developmentally  
217 regulated.

218

219 **Hepatocyte-specific expression of CUG960i RNA induces increased lipid**  
220 **accumulation and liver injury**

221

222 As the effects of DM1 in the liver are largely unstudied, and even the role of MBNL

223 proteins in the liver are unknown, we took a generalized approach to assess the

224 pathological consequences of DM1 within the liver. This process started before

225 sacrifice, as blood glucose levels just before sacrifice indicate a slight difference in the

226 blood glucose levels between male DM1 liver mice and male controls (**Fig. 3A**).

227 However, this difference does not occur within the female groups (**Fig. S2A**). There was

228 also no difference between DM1 liver mice and controls during glucose tolerance testing

229 performed in the weeks before sacrifice (**Fig. 3B, S2B**). Median mouse weight between

230 control and DM1 mice showed no significant difference (**Fig. S2C**).

231 As glucose intolerance is a common symptom in DM1, we compared GTT analysis from

232 the DM1 liver mice and control mice against a DM1 mouse model commonly studied for

233 skeletal muscle pathologies, the HSA L/R model (Mankodi, 2000). The HSA L/R model

234 expresses the toxic CUG repeat containing RNA only within the muscle tissues,

235 allowing us to compare the direct contributions of liver and muscle tissue towards

236 glucose intolerance in DM1. Interestingly, while the HSA L/R mice showed a significant

237 degree of glucose intolerance, the DM1 liver mice were normal in their glucose handling

238 (**Fig 3B**).

239 Histological analysis of the DM1 mice livers using Hematoxylin and Eosin (H&E)  
240 staining revealed varying degrees of morphological changes and regions with  
241 decreased sinusoidal spacing within the DM1 livers (**Fig 3C**). Additionally, increased  
242 lobular inflammation and necrotic patches were found within the DM1 livers (**Fig. 3C**).  
243 DM1 patients have shown an increased susceptibility to fatty liver disease (Bhardwaj &  
244 Duchini, 2010; Shieh et al., 2010), therefore, we used Oil Red O staining on frozen mice  
245 liver tissues to interrogate the lipid accumulation within the DM1 liver model. Relative to  
246 the control animals, DM1 liver mice showed a significant increase in lipid droplets (**Fig.**  
247 **3C, D**). While a long-term Dox diet can result in a modest accumulation of lipids in the  
248 liver, the DM1 mice consistently displayed higher lipid levels nearly twice that of  
249 respective controls. Furthermore, the mouse liver to carcass weight ratio showed a  
250 significantly higher hepatosomatic index in DM1 liver mice than that of respective  
251 controls (**Fig. 3E**), with a median increase of 36.6%.

252

### 253 **DM1 murine liver models are more susceptible to fatty liver disease and injury**

254

255 As DM1 patients face dietary and mobility challenges that often require counseling and  
256 careful monitoring, we set out to test if the macronutrient composition of the patient diet  
257 impacts the DM1 liver's susceptibility to NAFLD (Ashizawa et al., 2018; Heatwole et al.,  
258 2012; Savkur et al., 2001; Chris Turner & Hilton-Jones, 2010). To do so, we fed DM1  
259 liver mice, and ApoE-rtTA controls normal chow supplemented with a 2 g/kg Dox diet  
260 until weaning as previously described. Once weaned, the mice were switched to a high-  
261 fat, high-sugar, and heightened cholesterol (western) diet supplemented with 0.1 g/kg

262 Dox for a total of eight additional weeks (**Fig. 5a**) (Elmgren et al., 2007; Escolà-Gil et al.,  
263 2011). As before, we analyzed GTT and four-hour fasted glucose levels before  
264 sacrifice.

265 GTT analysis again showed no difference between DM1 mice and control animals (**Fig.**  
266 **5B**); however, there was a slight difference in 4 hour fasted blood glucose levels  
267 between male DM1 and male control mice (**Fig. 5C**). In reverse of the basal diet, DM1  
268 mice had significantly lower blood glucose.

269 While control livers turned pale following a high fat, high sugar diet, the DM1 livers  
270 became exceedingly lighter, with much of the usual red color replaced with off-white due  
271 to excess lipid accumulation (**Fig 5D**). Both DM1 and control mice showed significant  
272 increases in micro-and macro-vesicular steatosis, inflammation, and evidence of cell  
273 death on the western diet compared to the regular rodent diet (**Fig. 5D**). However, DM1  
274 mice showed much greater steatosis, patchy necrosis as well as ballooning and  
275 feathery degeneration after western diet feeding. Oil Red O staining showed that livers  
276 of DM1 mice had a much higher density of lipid droplets as well as a significant increase  
277 in the number of large lipid droplets (**Fig. 5D**), making them challenging to quantify via  
278 image analysis. Therefore, we used an alternative method to determine the relative  
279 accumulation of lipids in the western diet-fed control and DM1 mice. A  
280 hexane/isopropanol lipid extraction protocol was used to collect hydrophobic fatty acids  
281 from small liver portions. A colorimetric assay for triglycerides was performed upon  
282 these extracts (**Fig. 5E**). This analysis revealed two interesting features. First, the livers  
283 from DM1 mice fed the regular rodent diet accumulated as many triglycerides as the

284 livers from control mice on the western diet. Second, the livers of DM1 mice fed a  
285 western diet accumulated significantly more triglycerides than any other group.  
286 Western diet fed DM1 mice also had a more significant increase in liver to body weight  
287 ratios than controls (**Fig. 5F**). The mean body weight between DM1 and control mice is  
288 invariant, suggesting that the increase accumulation of lipids in the liver is not due to a  
289 greater increase in body weight (**Fig. S2E**).

290

### 291 **DM1 liver model mice demonstrate decreased drug metabolism**

292

293 An often-reported challenge when treating DM1 patients is that they demonstrate  
294 increased susceptibility to anesthetics and analgesics (Ashizawa et al., 2018; Campbell  
295 et al., 2010; Veyckemans & Scholtes, 2013). These complications are most noticeable  
296 during surgical procedures wherein DM1 patients exhibit much longer recovery times  
297 from various anesthetics and muscle relaxants. In the case of a few anesthetics, the  
298 patient may require intervention to prevent death (Groh et al., 2008; Mathieu et al.,  
299 1997). Because liver is the primary organ involved in drug metabolism, we hypothesized  
300 that DM1 livers might be compromised in responding to and metabolizing xenobiotics,  
301 thereby decreasing DM1 patients' ability to clear certain drugs from their system.  
302 We first chose zoxazolamine, a muscle relaxant, to test this hypothesis. Zoxazolamine  
303 testing in mice consists of inducing muscle paralysis in the animals via zoxazolamine  
304 injection and then monitoring them until they can self-right and move around freely (**Fig.**  
305 **6A**). Zoxazolamine metabolism generally shows a sex-specific response in mice;

306 however, in both males and females, DM1 mice took at least 50% longer to recover  
307 from the drug-induced paralysis (**Fig. 6B**).

308 We next tested if a similar reduction in drug metabolism occurred with common, over-  
309 the-counter analgesics such as acetaminophen (APAP). APAP is hepatotoxic if  
310 consumed in high concentrations as it generates toxic levels of N-acetyl-p-  
311 benzoquinone imine (NAPQI) metabolite after oxidation by CYP2E1 in perivenous  
312 hepatocytes (James 2003) (**Fig 6C**). Even a low dose of APAP can induce liver toxicity  
313 if CYP2E1 activity is high, and conversely, the liver can be insulated from APAP toxicity  
314 if CYP2E1 activity is ablated (Zaher 1998). In mice, the LD50 of APAP is between 320  
315 and 370 mg per kg of bodyweight when administered intraperitoneally (Craig 1980). To  
316 see if DM1 changed susceptibility to APAP-induced hepatic injury, we injected 350 mg  
317 of APAP per kg of body weight into fasted DM1 and control mice. Mice were monitored  
318 for 8 hours and then left to recover for an additional 16 hours before being sacrificed.

319 A difference was immediately noticed between DM1 and control mice, as significantly  
320 more control mice died within the first 8 hours compared to DM1 mice (**Fig. 6D**). Upon  
321 collecting the liver from the surviving mice, 24 hours post-APAP injection, almost all  
322 control animals show widespread signs of liver necrosis (**Fig. 6E**). However, APAP-  
323 treated DM1 livers showed fewer instances of injury and necrosis (**Fig. 6E**). H&E  
324 staining of the APAP treated livers also showed marked differences between DM1 and  
325 control mice, with DM1 mice still showing extensive injury and hepatocyte vacuolization  
326 but far less necrosis. (**Fig. 6F**).

327



## 328 **Discussion**

329 Several reports have demonstrated that DM1 is a multisystemic disease, and that a  
330 variety of tissues demonstrate pathologies that affect patients' health (Brunner et al.,  
331 1992; Jiang et al., 2004; Machuca-Tzili et al., 2005). In this study, we have demonstrated  
332 that the liver is one of the many organs negatively affected by DM1.

333 Previous work has demonstrated that MBNL proteins are upregulated within the  
334 hepatocytes as the liver matures after birth (Bhate et al., 2015). We have shown here that  
335 the mechanism by which DM1 affects the liver is to inhibit not only MBNL1 but also  
336 MBNL2 and other splicing factors as they work to reinforce a pattern of splicing that allows  
337 the liver to perform mature functions. Inhibition of these splicing factors leads to various  
338 consequences, including increased lipid accumulation, improper regulation of CYP450  
339 activity, and increased susceptibility to hepatocellular injury. These cellular defects, in  
340 turn, lead to more gross pathologies, including a propensity towards fatty liver disease,  
341 hepatic necrosis, and susceptibility to injury from toxins and dietary stress.

342 In conclusion, we have demonstrated that MBNL1 and MBNL2 serve essential roles in  
343 facilitating mature liver activity. The sequestration of these proteins by toxic CUG repeat  
344 containing RNAs produced in DM1 causes a global RNA processing and gene expression  
345 defects, inhibiting these abilities. These findings in part explain the previous reports of  
346 increased fatty liver disease and metabolic disorders in DM1 patients ((Achiron et al.,  
347 1998; Bhardwaj & Duchini, 2010; Shieh et al., 2010)). Our work also highlights the  
348 importance of continued research into what role the liver plays in the general metabolic  
349 disruption drug sensitivities in DM1 patients and what role the liver might play in  
350 contributing to the unique susceptibility DM1 patients display towards specific muscle

351 relaxants and anesthetics. In conclusion, we have demonstrated that MBNL1 and MBNL2  
352 serve essential roles in facilitating mature liver activity. The sequestration of these  
353 proteins by toxic CUG repeat containing RNAs produced in DM1 causes a global RNA  
354 processing and gene expression defects, inhibiting these abilities. These findings in part  
355 explain the previous reports of increased fatty liver disease and metabolic disorders in  
356 DM1 patients (Achiron et al., 1998; Bhardwaj & Duchini, 2010; Shieh et al., 2010). Our  
357 work also highlights the importance of continued research into what role the liver plays in  
358 the general metabolic disruption and drug sensitivities in DM1 patients and what role the  
359 liver might play in contributing to the unique susceptibility DM1 patients display towards  
360 specific muscle relaxants and anesthetics.

361

## 362 **ACKNOWLEDGEMENTS**

363 Work in the Kalsotra laboratory is supported by National Institute of Health  
364 (R01HL126845, R01AA010154), Muscular Dystrophy Association (MDA514335), and the  
365 Beckman Fellowship from the Center for Advanced Study at the University of Illinois  
366 Urbana-Champaign. Z.D. was supported by the NIH Chemistry–Biology Interface training  
367 program (T32-GM070421). U.V.C. was supported by the Herbert E. Carter fellowship in  
368 Biochemistry. A.G. was supported by the Jenner Family Summer Research Fellowship.  
369 We acknowledge support from the Transgenic mouse core, High-throughput sequencing  
370 and genotyping core and Histology-microscopy core facilities at the University of Illinois,  
371 Urbana-Champaign.

## 372 **AUTHOR CONTRIBUTIONS**

373 Z.D., and A.K. conceived the project and designed the experiments. Z.D., U.V.C. and  
374 A.G. performed experiments and analyzed the data. Z.D. and A.K. interpreted results and  
375 wrote the manuscript. All authors discussed the results and edited the manuscript.

#### 376 **COMPETING INTERESTS**

377 The authors declare no competing financial interests.

#### 378 **RESOURCE AVAILABILITY**

##### 379 **Lead Contact**

380 Requests for reagents, resources and/or additional information should be directed to the  
381 corresponding author, Auinash Kalsotra ([kalsotra@illinois.edu](mailto:kalsotra@illinois.edu)).

##### 382 **Materials Availability**

383 Please contact corresponding author for materials or resources generated in this study

384

## 385 **Materials and Methods**

386

### 387 *Mouse Models*

388 National Institutes of Health (NIH) and University of Illinois, Urbana-Champaign  
389 (UIUC) institutional guidelines were followed in the use and care of laboratory animals.  
390 All experimental protocols were performed as approved by the Institutional Animal Care and Use  
391 Committee. The study is not gender-specific and specimens include both male and female  
392 animals; however, as attributes such as glucose regulation and body weight are sex specific,  
393 animal sex was always recorded. Whole liver tissues and hepatocytes were isolated from mice  
394 following guidelines for euthanasia and/or anesthesia.

395 Four mouse models were utilized in this study. First, the control animals used for the DM1  
396 experiment, the ApoE-rtTA mice, were a mixed strain C57Bl6/DBA mouse line, with a single  
397 transgene containing a reverse tetracycline TransActivator (rtTA), expressed under  
398 the ApoE promoter (Xu et al., 2005). Second, the “DM1 liver” line, was also a mixed strain line,  
399 combining FVB background TRE-960i mice with the ApoE-rtTA mice. The resulting  
400 FVB/C57Bl6/DBA mice contained both the ApoE-rtTA transgene as well as tetracycline response  
401 element (TRE) driven truncated DMPK gene containing only the last 5 exons of human DMPK  
402 (Morriss et al., 2018). The DMPK construct also contained an elongated CUG repeat sequence,  
403 with a total of 960 repeats. These repeats are interrupted every 20 repeats with a “ctcga”  
404 sequence to prevent the overall repeat sequence from undergoing expansion or shrinkage. Both  
405 the ApoE-rtTA mice and DM1 liver mice maintained as homozygotes for all transgenic alleles.

406 HSA L/R mice were FVB mice expressing a truncated human skeletal actin (HSA) with a  
407 ~240 CUG repeat sequence in the 3' UTR of the transgene (Mankodi, 2000). The HSA was driven  
408 by the skeletal actin promoter, allowing for the expression of CUG repeats within the skeletal  
409 muscle tissue exclusively. The HSA L/R mice were maintained as homozygotes.

410 The final model, the *Mbnl1* knock out (KO) or *Mbnl1*<sup>ΔE3/ΔE3</sup> line was an FVB mouse where  
411 the 1<sup>st</sup> coding exon of *Mbnl1* has been replaced with a cassette using cre-lox insertion (Kanadia,  
412 2003). This mouse line was maintained in the heterozygous state, and homozygous mutant  
413 (*Mbnl1*<sup>ΔE3/ΔE3</sup>) or homozygous wildtype (*Mbnl1*<sup>Wt/Wt</sup>) being generated for study or as controls when  
414 needed.

#### 415 *Diet Scheme*

416 Both the DM1 liver and ApoE-rtTA mice were fed under the following scheme unless  
417 otherwise noted. To mimic the DM1 conditions seen in human patients, we induced the disease at  
418 birth, giving the mothers 2.0 g/kg doxycycline (Dox) supplemented Teklad 2018 18% protein  
419 global rodent diet; the Dox is transmitted through the mother's milk to the pups. The 2.0 g/kg Dox  
420 diet is continued until weaning, which occurs at 21 days after birth.

421 For most experiments performed in this study, the diet of the mice was then switched to a  
422 0.1 g/kg Dox supplemented Teklad 2018 global rodent diet and maintained on this diet until  
423 sacrifice at 9 weeks of age. Some important exceptions were the mice used for RNA-seq,  
424 which were maintained on a diet of 2 g/kg Dox supplemented diet until sacrifice at 9 weeks. Mice  
425 noted as "No-Dox" were fed only global rodent diet without Dox until sacrifice at 9 weeks. Mice  
426 noted as "Recovery" were fed 0.1g/kg Dox supplemented diet as normal, but then switched back  
427 to Dox free diet prior to sacrifice at 9 weeks of age.

428 Western Diet mice were fed as before, with the mothers being fed 2g/kg Dox  
429 supplemented chow until weaning, at which point the mice were transitioned to a high fat, high  
430 sugar, cholesterol supplemented "western, purified atherogenic" Diet (Teklad 88137),  
431 supplemented with 0.1g/kg Dox. These mice were maintained on this diet for 8 weeks after  
432 weaning, until being sacrificed at 11 weeks of age.

#### 433 *Glucose Tolerance Testing (GTT)*

434 GTT was performed on male and female mice, either 7 days prior to sacrifice if they were  
435 maintained on the 0.1g/kg Dox diet, or at 10 and 5 days prior to sacrifice if they were on the

436 western diet. For both cases, GTT was performed after the mice were fasted for 24 hours. Glucose  
437 was injected through intraperitoneal injection (IP) at a concentration of 2 g/kg body weight. Tails  
438 were clipped, blood was collected, and glucose was measured, using a One Touch Ultra 2 glucose  
439 meter, after 0, 15, 30, 60, 90, and 120 minutes.

#### 440 *Sacrifice and tissue collection*

441 Mice were fasted in the morning and were sacrificed after 4 to 6 hours of  
442 fasting. Liver and carcass weight were taken at the time of sacrifice, as well as 600  $\mu$ L of blood  
443 via retro-orbital bleeding. During sacrificing, liver tissues were collected for (1) RNA, protein, and  
444 lipid isolation, (2) paraffin-embedding, and (3) cryo-sectioning. Tissue for cryo-sectioning was  
445 collected by sectioning two pieces of liver, embedding the tissues in Optimal Cutting Temperature  
446 (OCT) compound and frozen on dry ice. Tissues for paraffin embedding were stored in neutral  
447 buffered formalin for 48 hours before being stored in 70% ethanol until paraffin embedding. The  
448 remaining tissue was flash frozen in liquid nitrogen.

#### 449 *Isolation of Hepatocytes*

450 Hepatocyte isolation was performed using two-step perfusion with centrifugal separation  
451 to produce a cell population highly enriched in hepatocytes; this population of cells was then  
452 used for RNA-seq analysis. The method for hepatocyte isolation was adapted from Li et al.,  
453 2010.

454 Briefly, mice were anesthetized in a chamber supplied with isoflurane and oxygen (2.5%  
455 isoflurane in oxygen, 1.5Lmin.). Mice were maintained on the anesthetic during the  
456 procedure via use of a nose cone. The liver was perfused via cannulation of the portal vein  
457 with 30-40 ml of a 1 $\times$  HBSS (Hank's balanced salt solution) with phenol red (without  $\text{Ca}^{2+}$  and  
458  $\text{Mg}^{2+}$ ), 0.5 mM EDTA solution, at a flow rate between 3 and 5 mL per minute. This solution was  
459 then followed by 50 ml of a 1 $\times$  HBSS (with  $\text{Ca}^{2+}$ ), 5.4 mM  $\text{CaCl}_2$ , 0.04 mg ml $^{-1}$  soybean trypsin  
460 inhibitor, and 3000 units of collagenase type I (Worthington Chemicals)). Subsequently, the liver  
461 was massaged in a Petri dish containing 1 $\times$  HBSS with phenol red (without  $\text{Ca}^{2+}$  and  $\text{Mg}^{2+}$ ), to

462 release cells from the liver capsule, and then the cell suspension was passed through a 70- $\mu$ m  
463 filter to obtain a single-cell suspension. The cells were then centrifuged at 50  $\times$  g for 5 min (4  $^{\circ}$ C)  
464 to separate live hepatocytes from non-parenchymal cells and dead cells. The cells were further  
465 washed 3 times in 1 $\times$  HBSS as above, and then flash frozen in liquid nitrogen and stored at  
466  $-80^{\circ}$ C till further use.

#### 467 *RNA Isolation and cDNA Synthesis*

468 Total RNA was isolated from either liver or from perfused hepatocytes via TRIzol  
469 extraction. One milliliter of TRIzol was added to small pieces (approximately 30  $\mu$ g to 50  $\mu$ g) of  
470 either liver or hepatocyte isolate. Lysing of the cells was hastened by homogenization of via  
471 bullet blending with NextAdvanced Zirconium oxide 1mm beads. Chloroform was added and  
472 the mixture was centrifuged for 10 minutes at 10,000xg which caused a separation of  
473 layers. The aqueous layer, containing extracted RNA, was removed and to this was added 600  
474  $\mu$ L of isopropanol. The solution was then mixed and stored at  $-20^{\circ}$ C overnight (or for at least 8  
475 hours). Afterwards, the mixture was centrifuged for 40 min at 12,000xg, causing the precipitation  
476 of the RNA. The chloroform was removed, and the RNA pellet was washed with 70% ethanol.  
477 The RNA was then dissolved in water. RNA purity and concentration were assessed with  
478 a Biotek Synergy 2 UV spectrometer.

479 cDNA synthesis was performed on 1  $\mu$ g of RNA, using random hexamer primers and  
480 Maxima Reverse Transcriptase (from Thermo Scientific). The cDNA was diluted to a total  
481 volume of 200  $\mu$ L.

#### 482 *RNA-seq*

483 RNA was isolated from experiment specific hepatocytes using RNeasy tissue mini-kit  
484 (Qiagen). Prior to library preparation, RNA quality was assessed using an Agilent Bioanalyzer,  
485 by the Functional Genomics Core at the Roy J. Carver Biotechnology Center, UIUC. Poly-  
486 A selected, RNA-seq libraries preparation and 150-bp paired-end Illumina sequencing was  
487 performed on a NOVASEQ 6000 at the High Throughput Sequencing and Genotyping Unit,

488 UIUC. RNA-seq reads were processed for quality and read length filters using Trimmomatic  
489 (version 0.39). RNA-seq reads were further aligned to the mouse genome (mm10) using STAR  
490 (version 2.5.2).

491 Gene expression levels were determined as TPM using count and differential expression  
492 values obtained from DESeq2 (version 1.8.2), Htseq (version  
493 0.6.1) and Cuffdiff 2 (version 2.2.1) (Anders et al., 2015; Love et al., 2014; Trapnell et al., 2012).  
494 Genes were considered as having significant differential expression following imposed cutoff  
495 clearance ( $FDR \leq 0.05$ ,  $\log_2(\text{fold change}) \geq 1$ ). Differential splicing analysis was performed using  
496 rMATS (version 3.2.5), and significant events were identified using imposed cutoffs  
497 ( $FDR \leq 0.10$ , junction read counts  $\geq 10$ , PSI  $\geq 10\%$ ) (Shen et al., 2014). Motif analysis for  
498 differentially spliced exons was performed using rMAPS with default parameters, and putative  
499 motifs as described previously (Park et al., 2016). To perform alternative poly adenylation (APA)  
500 analysis, 3'UTR expression quantification was performed via Salmon (version 1.0.0), followed  
501 by analysis via qAPA (version 1.2.2) (Ha et al., 2018; Patro et al., 2017). APA events were  
502 determined as being significant if there was a change of 5 TPM or greater. Gene ontology  
503 analysis was performed using DAVID (version 6.8) (Bonnot et al., 2019; Huang et al., 2007,  
504 2009; Supek et al., 2011).

505 To perform the exon ontology analysis, exons undergoing significant changes in splicing  
506 were converted to corresponding human exons in the hg19 annotation using UCSClifter with  
507 minimum ratio of bases matching as 0.8 (Kent et al., 2002). Additionally, the exons in hg19  
508 reported by UCSClifter were checked for gene identity match to the mouse exon's parent  
509 gene. These exons were then analyzed for ontology using the exon ontology and FasterDB  
510 packages (Benoit-Pilven et al., 2018).

#### 511 *q-PCR*

512 cDNA, primer, SYBR, and water were mixed in a qPCR plate. The qPCR reaction was  
513 performed using a QuantStudio 3 Real-Time PCR System (Thermo Fisher). In these qPCR



514 reactions, the melting temperature was 95°C and the annealing/elongation temperature was  
515 60°C. Primers used for the qPCR reactions are listed in Supplemental Table 1.

#### 516 *RNA-FISH and Immunofluorescence (IF)*

517 At sacrificing, pieces of liver were placed within Tissue-Tek OCT (Optimal Cutting  
518 Temperature) Compound and frozen with dry ice. These frozen blocks were sectioned at 10 µm  
519 with a Leica CM3050 S cryostat at the Carl R. Woese Institute for Genomic Biology (UIUC).

520 RNA-FISH/IF was performed on these cryosections. Sections were washed in 1X PBS,  
521 then fixed with 10% NBF. Slides were washed with 1X PBS, permeabilized with 0.5% Triton-X in  
522 1X PBS, washed with 1X SSC, and then washed with 30% Formamide in 2X SSC. FISH probe  
523 was then applied (the solution contained 2 µg/mL BSA, 66 µg/mL yeast tRNA, and 1 ng/µL Cy5-  
524 (CAG)<sub>10</sub> (Integrated DNA Technologies) dissolved in 30% formamide in 2X SSC). After  
525 incubation at 37°C for two hours, sections were washed with 30% formamide in 2X SSC (for 30  
526 minutes) and washed twice with 1X SSC. The slides were again fixed with 10% NBF, washed  
527 with 1X TBS, and re-permeabilized with 0.5% Triton-X in PBS. Slides were washed in 1X TBS  
528 before being blocked in 10% normal goat serum with 1% BSA in 1X TBS for two hours (at room  
529 temperature). After blocking, the slides were drained with a vacuum trap and incubated in 1:500  
530 primary antibody in 1X TBS with 1% BSA, at 4°C overnight.

531 The next day, the slides were washed in 1X TBS with 0.05% Triton-X, then washed in  
532 1X TBS. Then, they were incubated in 1:500 secondary antibody in 1X TBS for 1 hour at room  
533 temperature. Slides were washed with TBS with 0.05% Triton-X, washed with 1X PBS, stained  
534 with NucBlue (Invitrogen) in 1X PBS for 20 minutes, and washed with 1X PBS. Slides  
535 were imaged on a Zeiss LSM 710 microscope at the Carl R. Woese Institute for Genomic  
536 biology at UIUC. A list of antibodies used is provided in Supplemental Table X.

#### 537 *RT-PCR Splice Assays*

538 Target events were amplified via PCR using the primers listed in Supplemental Table X.  
539 The PCR cycle had a melting temperature of 95°C, an annealing temperature of 55°C, and an

540 elongation temperature of 72°C. The PCR product was resolved down a 5.5% PAGE gel,  
541 stained with ethidium bromide, and imaged using a Bio-Rad Gel Doc machine.

542 To quantify the percent splicing change, Bio-Rad Image Lab Software (version 6.0.1)  
543 was used to measure the intensity of the bands appearing of the gel. Splicing change is  
544 reported as Percent Spliced In, a ratio of the intensity of the upper band (containing the  
545 alternatively spliced exon) to the combined intensity of the upper and lower bands (the lower  
546 band does not contain the alternatively spliced exon).

#### 547 *Histology: Hematoxylin and Eosin*

548 To perform Hematoxylin and Eosin staining, paraffin embedded tissues were sectioned  
549 into 5 µm thick sections, and then deparaffinized with three xylene washes. The slides were  
550 rehydrated in ethanol solutions of decreasing concentration (100%, 95%, 80%, and 50%)  
551 before being placed in water. The slides were stained with Hematoxylin 7211 for 1.5 to 2  
552 minutes and washed in water. Slides were blued in a 2% sodium bicarbonate, 0.2% magnesium  
553 sulfate bluing solution before being washed in water again. After being placed in an ethanol  
554 solution, the slides were stained with eosin for 15-20 seconds, washed with ethanol, and  
555 dehydrated with xylene. They were finally mounted/cover slipped with Permount.

556 All slides were imaged by on a Hamamatsu Nanozoomer at the Carl R. Woese Institute  
557 for Genomic Biology at UIUC.

#### 558 *Histology: Oil Red O. Staining*

559 Oil Red O. stain was performed on cryosections (reference “RNA-FISH and  
560 Immunofluorescence (IF)” for details on the preparation of cryosections). The cryosections were  
561 first fixed in 10% NBF, then hydrated in 1X PBS. After placing the slides in 60% isopropanol, the  
562 slides were stained in fresh Oil Red O. solution (consisting of Oil Red O. dye dissolved in 60%  
563 isopropanol). The slides were then washed with 60% isopropanol, counterstained briefly in  
564 Hematoxylin 7211 and washed with tap water. The slides were then mounted with CC mount.

565 The slides were imaged on a Hamamatsu Nanozoomer at the Carl R. Woese Institute for  
566 Genomic Biology at UIUC.

567 To quantitatively measure the accumulation of lipids, Oil Red O. Images at 10X zoom  
568 were collected and then analyzed using a pipeline on Cell Profiler (Kamentsky et al., 2011;  
569 Mcquin et al., 2018).

#### 570 *Lipid Extraction and Analysis*

571 Twenty to fifty milligrams of liver tissue were weighed into locking cap 1.5 mL Eppendorf  
572 tubes. To this was added 600  $\mu$ L chilled 3:2 hexanes/isopropanol solution and 6-  
573 10 NextAdvanced zirconium oxide 1mm beads. The tubes were homogenized on a bullet  
574 blender for 30 seconds, and then allowed to rest on ice for 2 min. This homogenization process  
575 was repeated a total of 5 times before samples were spun down at  $3000 \times g$  for 10 min in  
576 temperatures at  $4^{\circ}\text{C}$ . The liquid phase was then collected into a second Eppendorf tube and set  
577 aside. An additional 600  $\mu$ L chilled 3:2 hexanes/isopropanol solution was then used to break up  
578 the pellet, and samples were rested on ice for 15 min with periodic vortexing. Again, samples  
579 centrifuged at  $3000 \times g$  for 10 min, and the liquid phase was then combined with the liquid set  
580 aside previously. Samples were then allowed to dry in open air over night.

581 Samples were then diluted in 200  $\mu$ L of 1x PBS with 2% Triton X-100. Samples were  
582 vortexed and allowed to dissolve at  $4^{\circ}\text{C}$ ; further dilution would occur if necessary. Once samples  
583 had been dissolved, they were analyzed using an Infinity triglycerides colorimetric kit.

#### 584 *Serum Alanine Aminotransferase (ALT) and Aspartate Aminotransferase (AST) Testing*

585 Whole blood from mice was collected via retro-orbital puncture in Capiject gel/clot activator  
586 tubes, centrifuged for 3 min at  $3000 \times g$ , and then stored at  $-80^{\circ}\text{C}$  till further analysis. ALT and  
587 AST analysis is performed using commercial Thermo Scientific serum chemistry kits

#### 588 *Zoxazolamine Recovery Testing*

589 Zoxazolamine (Zox) solution was prepared the day prior to experimentation by dissolving  
590 enough Zox in DMSO such that the final concentration of Zox was 15  $\mu\text{g}/\mu\text{L}$  in a 95% Corn-Oil,

591 5% DMSO solution. Mice were then fasted for 18-22 hours prior to 120 mg/kg Zox injections;  
592 Zox solutions were homogenized vigorously between injections to ensure a homogenous  
593 solution.  
594 Once treated with Zox, mice could roam freely until motor function was lost, at which point mice  
595 would be placed in the supine position on an insulating blanket. Time would then be measured  
596 until the mice were able to regain muscle control. Time counting ceased when the mouse could  
597 successfully self-right three times(Fujii et al., 1968).

#### 598 *APAP Insult Testing*

599 Acetaminophen (APAP) solutions were prepared immediately before use. Twenty mg of  
600 APAP would be dissolved in one mL of sterile 1x PBS. This solution would then be heated at  
601 55C for 15 min with periodic vortexing. Once the 15 min incubation was complete, the APAP  
602 solution would be kept at 40C for the duration of the injection process, and vigorous mixing  
603 would occur between injections.

604 Mice for APAP testing were fasted overnight (18-22 hours) and then injected with either  
605 350 mg/kg. Mice would then be observed for 8 hours, at which point the surviving mice were  
606 returned to the mouse facilities. The following day, mice would be harvested for serum and liver  
607 samples 24hrs post APAP injection(McGill et al., 2012; Mossanen & Tacke, 2015).

#### 608 *Statistical Analysis*

609 All quantitative experiments have at least three independent biological repeats. The  
610 results were expressed with mean and standard deviation, unless mentioned otherwise.  
611 Differences between groups were examined for statistical significance using or one-way  
612 analysis of variance (ANOVA) for more than two groups using the GraphPad Prism 6  
613 Software. In all figures, significance was set as  $p \leq 0.05$ , “\*” indicates  $p < 0.05$ , “\*\*” indicates  $p <$   
614  $0.01$ , “\*\*\*” indicates  $p < 0.001$ , and “\*\*\*\*” indicates  $p < 0.0001$ .

615

## 616 References

- 617 Achiron, A., Barak, Y., Magal, N., Shohat, M., Cohen, M., Barar, R., & Gadoth, N.  
618 (1998). Abnormal liver test results in myotonic dystrophy. *Journal of Clinical*  
619 *Gastroenterology*, 26(4), 292–295. [https://doi.org/10.1097/00004836-199806000-](https://doi.org/10.1097/00004836-199806000-00016)  
620 00016
- 621 Anders, S., Pyl, P. T., & Huber, W. (2015). HTSeq--a Python framework to work with  
622 high-throughput sequencing data. *Bioinformatics*, 31(2), 166–169.  
623 <https://doi.org/10.1093/bioinformatics/btu638>
- 624 Ashizawa, T., Gagnon, C., Groh, W. J., Gutmann, L., Johnson, N. E., Meola, G.,  
625 Moxley, R., Pandya, S., Rogers, M. T., Simpson, E., Angeard, N., Bassez, G.,  
626 Berggren, K. N., Bhakta, D., Bozzali, M., Broderick, A., Byrne, J. L. B., Campbell,  
627 C., Cup, E., ... Winblad, S. (2018). Consensus-based care recommendations for  
628 adults with myotonic dystrophy type 1. *Neurology: Clinical Practice*, 8(6), 507–520.  
629 <https://doi.org/10.1212/CPJ.0000000000000531>
- 630 Bangru, S., Arif, W., Seimetz, J., Bhate, A., Chen, J., Rahan, E. H., Carstens, R. P.,  
631 Anakk, S., & Kalsotra, A. (2018). Alternative splicing rewires Hippo signaling  
632 pathway in hepatocytes to promote liver regeneration. *Nature Structural &*  
633 *Molecular Biology*, 25(10), 928–939. <https://doi.org/10.1038/s41594-018-0129-2>
- 634 Benoit-Pilven, C., Marchet, C., Chautard, E., Lima, L., Lambert, M.-P., Sacomoto, G.,  
635 Rey, A., Cologne, A., Terrone, S., Dulaurier, L., Claude, J.-B., Bourgeois, C. F.,  
636 Auboeuf, D., & Lacroix, V. (2018). Complementarity of assembly-first and mapping-  
637 first approaches for alternative splicing annotation and differential analysis from  
638 RNAseq data. *Scientific Reports*, 8(1). <https://doi.org/10.1038/s41598-018-21770-7>
- 639 Bhardwaj, R. R., & Duchini, A. (2010). Non-alcoholic steatohepatitis in myotonic  
640 dystrophy: DMPK gene mutation, insulin resistance and development of  
641 steatohepatitis. *Case Reports in Gastroenterology*, 4(1), 100–103.  
642 <https://doi.org/10.1159/000292093>
- 643 Bhate, A., Parker, D. J., Bebee, T. W., Ahn, J., Arif, W., Rahan, E. H., Chorghade, S.,  
644 Chau, A., Lee, J.-H., Anakk, S., Carstens, R. P., Xiao, X., & Kalsotra, A. (2015).  
645 *ESRP2 controls an adult splicing programme in hepatocytes to support postnatal*  
646 *liver maturation*. 6, 8768. <https://doi.org/10.1038/ncomms9768>
- 647 Bonnot, T., Gillard, M. B., & Nagel, D. H. (2019). A Simple Protocol for Informative  
648 Visualization of Enriched Gene Ontology Terms. *Bio-Protocol*, 9(22), e3429.  
649 <https://doi.org/10.21769/BioProtoc.3429>
- 650 Brook, J. D., Mcurrach, M. E., Harley, H. G., Buckler, A. J., Church, D., Aburatani, H.,  
651 Hunter, K., Stanton, V. P., Thirion, J.-P., Hudson, T., Sohn, R., Zemelmann, B.,  
652 Snell, R. G., Rundle, S. A., Crow, S., Davies, J., Shelbourne, P., Buxton, J., Jones,  
653 C., ... Housman, D. E. (1992). *Molecular basis of myotonic dystrophy: Expansion of*  
654 *a trinucleotide (CTG) repeat at the 3' end of a transcript encoding a protein kinase*  
655 *family member*. 68(4), 799–808. [https://doi.org/10.1016/0092-8674\(92\)90154-5](https://doi.org/10.1016/0092-8674(92)90154-5)

- 656 Brunner, H. G., Nillesen, W., Van Oost, B. A., Jansen, G., Wieringa, B., Ropers, H. H.,  
657 & Smeets, H. J. (1992). Presymptomatic diagnosis of myotonic dystrophy. *Journal*  
658 *of Medical Genetics*, 29(11), 780–784. <https://doi.org/10.1136/jmg.29.11.780>
- 659 Campbell, N., Brandom, B., Day, J. W., & Moxley, R. (2010). *Practical Suggestions for*  
660 *the Anesthetic Management of a Myotonic Dystrophy Patient FOREWORD* :  
661 1(May), 1–6.
- 662 Chau, A., & Kalsotra, A. (2015). Developmental insights into the pathology of and  
663 therapeutic strategies for DM1: Back to the basics. *Developmental Dynamics*,  
664 244(3), 377–390. <https://doi.org/10.1002/dvdy.24240>
- 665 Day, J. W., & Ranum, L. P. W. (2005). Genetics and molecular pathogenesis of the  
666 myotonic dystrophies. *Current Neurology and Neuroscience Reports*, 5(1), 55–60.  
667 <https://doi.org/10.1007/s11910-005-0024-1>
- 668 Elmgren, A., Lelliott, C. J., Oscarsson, J., Bohlooly-Y, M., Törnell, J., Bjursell, M.,  
669 Egecioglu, E., & Gerdin, A.-K. (2007). Acutely reduced locomotor activity is a major  
670 contributor to Western diet-induced obesity in mice. *American Journal of*  
671 *Physiology-Endocrinology and Metabolism*, 294(2), E251–E260.  
672 <https://doi.org/10.1152/ajpendo.00401.2007>
- 673 Escolà-Gil, J. C., Llaverias, G., Julve, J., Jauhiainen, M., Méndez-González, J., &  
674 Blanco-Vaca, F. (2011). The cholesterol content of western diets plays a major role  
675 in the paradoxical increase in high-density lipoprotein cholesterol and upregulates  
676 the macrophage reverse cholesterol transport pathway. *Arteriosclerosis,*  
677 *Thrombosis, and Vascular Biology*, 31(11), 2493–2499.  
678 <https://doi.org/10.1161/ATVBAHA.111.236075>
- 679 Fujii, K., Jaffe, H., & Epstein, S. S. (1968). Factors influencing the hexobarbital sleeping  
680 time and zoxazolamine paralysis time in mice. *Toxicology and Applied*  
681 *Pharmacology*, 13(3), 431–438. [https://doi.org/10.1016/0041-008x\(68\)90119-1](https://doi.org/10.1016/0041-008x(68)90119-1)
- 682 Groh, W. J., Groh, M. R., Saha, C., Kincaid, J. C., Simmons, Z., Cifaloni, E.,  
683 Pourmand, R., Otten, R. F., Bhakta, D., Nair, G. V, Marashdeh, M. M., Zipes, D. P.,  
684 & Pascuzzi, R. M. (2008). Electrocardiographic Abnormalities and Sudden Death in  
685 Myotonic Dystrophy Type 1. *New England Journal of Medicine*, 358(25), 2688–  
686 2697. <https://doi.org/10.1056/nejmoa062800>
- 687 Ha, K. C. H., Blencowe, B. J., & Morris, Q. (2018). QAPA: a new method for the  
688 systematic analysis of alternative polyadenylation from RNA-seq data. *Genome*  
689 *Biology*, 19(1). <https://doi.org/10.1186/s13059-018-1414-4>
- 690 Harper, P. S. (2003). *Myotonic Dystrophy* (3rd ed.). W.B. Saunders.
- 691 Heatwole, C., Bode, R., Johnson, N., Quinn, C., Martens, W., McDermott, M. P.,  
692 Rothrock, N., Thornton, C., Vickrey, B., Victorson, D., & Moxley, R. (2012). Patient-  
693 reported impact of symptoms in myotonic dystrophy type 1 (PRISM-1). *Neurology*,  
694 79(4), 348–357. <https://doi.org/10.1212/WNL.0b013e318260cbe6>
- 695 Ho, T. H., Charlet-B, N., Poulos, M. G., Singh, G., Swanson, M. S., & Cooper, T. A.



- 696 (2004). Muscleblind proteins regulate alternative splicing. *EMBO Journal*, 23(15),  
697 3103–3112. <https://doi.org/10.1038/sj.emboj.7600300>
- 698 Huang, D. W., Sherman, B. T., & Lempicki, R. A. (2009). Systematic and integrative  
699 analysis of large gene lists using DAVID bioinformatics resources. *Nature*  
700 *Protocols*, 4(1), 44–57. <https://doi.org/10.1038/nprot.2008.211>
- 701 Huang, D. W., Sherman, B. T., Tan, Q., Kir, J., Liu, D., Bryant, D., Guo, Y., Stephens,  
702 R., Baseler, M. W., Lane, H. C., & Lempicki, R. A. (2007). DAVID Bioinformatics  
703 Resources: expanded annotation database and novel algorithms to better extract  
704 biology from large gene lists. *Nucleic Acids Research*, 35(suppl\_2), W169–W175.  
705 <https://doi.org/10.1093/nar/gkm415>
- 706 Jiang, H., Mankodi, A., Swanson, M. S., Moxley, R. T., & Thornton, C. A. (2004).  
707 Myotonic dystrophy type 1 is associated with nuclear foci of mutant RNA,  
708 sequestration of muscleblind proteins and deregulated alternative splicing in  
709 neurons. *Human Molecular Genetics*, 13(24), 3079–3088.  
710 <https://doi.org/10.1093/hmg/ddh327>
- 711 John Herbeck, C. J. (2013). Hepatic Glycogenosis in a Patient with Type 1 Myotonic  
712 Dystrophy. *Journal of Liver: Disease & Transplantation*, 02(02), 2012–2014.  
713 <https://doi.org/10.4172/2325-9612.1000110>
- 714 Kametsky, L., Jones, T. R., Fraser, A., Bray, M.-A., Logan, D. J., Madden, K. L., Ljosa,  
715 V., Rueden, C., Eliceiri, K. W., & Carpenter, A. E. (2011). Improved structure,  
716 function and compatibility for CellProfiler: modular high-throughput image analysis  
717 software. *Bioinformatics*, 27(8), 1179–1180.  
718 <https://doi.org/10.1093/bioinformatics/btr095>
- 719 Kanadia, R. N. (2003). A Muscleblind Knockout Model for Myotonic Dystrophy. *Science*,  
720 302(5652), 1978–1980. <https://doi.org/10.1126/science.1088583>
- 721 Kent, W. J., Sugnet, C. W., Furey, T. S., Roskin, K. M., Pringle, T. H., Zahler, A. M., &  
722 Haussler, A. D. (2002). The Human Genome Browser at UCSC. *Genome*  
723 *Research*, 12(6), 996–1006. <https://doi.org/10.1101/gr.229102>
- 724 Lee, J., Bai, Y., Chembazhi, U. V, Peng, S., Yum, K., Luu, L. M., Hagler, L. D., Serrano,  
725 J. F., Chan, H. Y. E., Kalsotra, A., & Zimmerman, S. C. (2019). Intrinsically cell-  
726 penetrating multivalent and multitargeting ligands for myotonic dystrophy type 1.  
727 *Proceedings of the National Academy of Sciences*, 116(18), 8709–8714.  
728 <https://doi.org/10.1073/pnas.1820827116>
- 729 Lee, J. E., & Cooper, T. A. (2009). Pathogenic mechanisms of myotonic dystrophy.  
730 *Biochemical Society Transactions*, 37(6), 1281–1286.  
731 <https://doi.org/10.1042/bst0371281>
- 732 Li, W.-C., Ralphs, K. L., & Tosh, D. (2010). Isolation and Culture of Adult Mouse  
733 Hepatocytes. In *Methods in Molecular Biology* (pp. 185–196). Humana Press.  
734 [https://doi.org/10.1007/978-1-59745-019-5\\_13](https://doi.org/10.1007/978-1-59745-019-5_13)
- 735 Lin, X., Miller, J. W., Mankodi, A., Kanadia, R. N., Yuan, Y., Moxley, R. T., Swanson, M.

- 736 S., & Thornton, C. A. (2006). Failure of MBNL1-dependent post-natal splicing  
737 transitions in myotonic dystrophy. *Human Molecular Genetics*, 15(13), 2087–2097.  
738 <https://doi.org/10.1093/hmg/ddl132>
- 739 Love, M. I., Huber, W., & Anders, S. (2014). Moderated estimation of fold change and  
740 dispersion for RNA-seq data with DESeq2. *Genome Biology*, 15(12).  
741 <https://doi.org/10.1186/s13059-014-0550-8>
- 742 Machuca-Tzili, L., Brook, D., & Hilton-Jones, D. (2005). Clinical and molecular aspects  
743 of the myotonic dystrophies: A review. *Muscle & Nerve*, 32(1), 1–18.  
744 <https://doi.org/10.1002/mus.20301>
- 745 Mankodi, A. (2000). *Myotonic Dystrophy in Transgenic Mice Expressing an Expanded*  
746 *CUG Repeat*. 289(5485), 1769–1772.  
747 <https://doi.org/10.1126/science.289.5485.1769>
- 748 Mathieu, J., Allard, P., Gobeil, G., Girard, M., De Braekeleer, M., & Bégin, P. (1997).  
749 Anesthetic and surgical complications in 219 cases of myotonic dystrophy.  
750 *Neurology*, 49(6), 1646 LP – 1650. <https://doi.org/10.1212/WNL.49.6.1646>
- 751 McGill, M. R., Williams, C. D., Xie, Y., Ramachandran, A., & Jaeschke, H. (2012).  
752 Acetaminophen-induced liver injury in rats and mice: Comparison of protein  
753 adducts, mitochondrial dysfunction, and oxidative stress in the mechanism of  
754 toxicity. *Toxicology and Applied Pharmacology*.  
755 <https://doi.org/10.1016/j.taap.2012.08.015>
- 756 Mcquin, C., Goodman, A., Chernyshev, V., Kamentsky, L., Cimini, B. A., Karhohs, K.  
757 W., Doan, M., Ding, L., Rafelski, S. M., Thirstrup, D., Wiegraebe, W., Singh, S.,  
758 Becker, T., Caicedo, J. C., & Carpenter, A. E. (2018). CellProfiler 3.0: Next-  
759 generation image processing for biology. *PLOS Biology*, 16(7), e2005970.  
760 <https://doi.org/10.1371/journal.pbio.2005970>
- 761 Miller, J. W. (2002). Recruitment of human muscleblind proteins to (CUG)<sub>n</sub> expansions  
762 associated with myotonic dystrophy. *The EMBO Journal*, 19(17), 4439–4448.  
763 <https://doi.org/10.1093/emboj/19.17.4439>
- 764 Morriss, G. R., Rajapakshe, K., Huang, S., Coarfa, C., & Cooper, T. A. (2018).  
765 Mechanisms of skeletal muscle wasting in a mouse model for myotonic dystrophy  
766 type 1. *Human Molecular Genetics*, 27(16), 2789–2804.  
767 <https://doi.org/10.1093/hmg/ddy192>
- 768 Mossanen, jc, & Tacke, f. (2015). Acetaminophen-induced acute liver injury in mice.  
769 *Laboratory Animals*. <https://doi.org/10.1177/0023677215570992>
- 770 Park, J. W., Jung, S., Rouchka, E. C., Tseng, Y.-T., & Xing, Y. (2016). rMAPS: RNA  
771 map analysis and plotting server for alternative exon regulation. *Nucleic Acids*  
772 *Research*, 44(W1), W333–W338. <https://doi.org/10.1093/nar/gkw410>
- 773 Patro, R., Duggal, G., Love, M. I., Irizarry, R. A., & Kingsford, C. (2017). Salmon  
774 provides fast and bias-aware quantification of transcript expression. *Nature*  
775 *Methods*, 14(4), 417–419. <https://doi.org/10.1038/nmeth.4197>



- 776 Philips, A. V, Timchenko, L. T., & Cooper, T. A. (1998). Disruption of splicing regulated  
777 by a CUG-binding protein in myotonic dystrophy. *Science (New York, N.Y.)*,  
778 280(5364), 737–741. <https://doi.org/10.1126/science.280.5364.737>
- 779 Savkur, R. S., Philips, A. V, & Cooper, T. A. (2001). Aberrant regulation of insulin  
780 receptor alternative splicing is associated with insulin resistance in myotonic  
781 dystrophy. *Nature Genetics*, 29(1), 40–47. <https://doi.org/10.1038/ng704>
- 782 Scotti, M. M., & Swanson, M. S. (2015). *RNA mis-splicing in disease*. 17(1), 19–32.  
783 <https://doi.org/10.1038/nrg.2015.3>
- 784 Scotti, M. M., & Swanson, M. S. (2016). RNA mis-splicing in disease. *Nature Reviews*  
785 *Genetics*, 17(1), 19–32. <https://doi.org/10.1038/nrg.2015.3>
- 786 Shen, S., Park, J. W., Lu, Z., Lin, L., Henry, M. D., Wu, Y. N., Zhou, Q., & Xing, Y.  
787 (2014). rMATS: robust and flexible detection of differential alternative splicing from  
788 replicate RNA-Seq data. *Proceedings of the National Academy of Sciences of the*  
789 *United States of America*, 111(51), E5593-601.  
790 <https://doi.org/10.1073/pnas.1419161111>
- 791 Shieh, K., Gilchrist, J. M., & Promrat, K. (2010). Frequency and predictors of  
792 nonalcoholic fatty liver disease in myotonic dystrophy. *Muscle and Nerve*, 41(2),  
793 197–201. <https://doi.org/10.1002/mus.21484>
- 794 Sobczak, K., Thornton, C. A., Finn, D. J., Manchanda, M., Mohan, A., Goodwin, M.,  
795 Charizanis, K., Zhang, C., Batra, R., Li, M., & Swanson, M. S. (2014). Loss of  
796 MBNL Leads to Disruption of Developmentally Regulated Alternative  
797 Polyadenylation in RNA-Mediated Disease. *Molecular Cell*, 56(2), 311–322.  
798 <https://doi.org/10.1016/j.molcel.2014.08.027>
- 799 Supek, F., Bošnjak, M., Škunca, N., & Šmuc, T. (2011). REVIGO Summarizes and  
800 Visualizes Long Lists of Gene Ontology Terms. *PLoS ONE*, 6(7), e21800.  
801 <https://doi.org/10.1371/journal.pone.0021800>
- 802 Trapnell, C., Roberts, A., Goff, L., Pertea, G., Kim, D., Kelley, D. R., Pimentel, H.,  
803 Salzberg, S. L., Rinn, J. L., & Pachter, L. (2012). Differential gene and transcript  
804 expression analysis of RNA-seq experiments with TopHat and Cufflinks. *Nature*  
805 *Protocols*, 7(3), 562–578. <https://doi.org/10.1038/nprot.2012.016>
- 806 Turner, C, & Hilton-Jones, D. (2010). *The myotonic dystrophies: diagnosis and*  
807 *management*. 81(4), 358–367. <https://doi.org/10.1136/jnnp.2008.158261>
- 808 Turner, Chris, & Hilton-Jones, D. (2010). The myotonic dystrophies: Diagnosis and  
809 management. *Journal of Neurology, Neurosurgery and Psychiatry*, 81(4), 358–367.  
810 <https://doi.org/10.1136/jnnp.2008.158261>
- 811 Veyckemans, F., & Scholtes, J. L. (2013). Myotonic DYSTROPHIES type 1 and 2:  
812 Anesthetic care. *Paediatric Anaesthesia*, 23(9), 794–803.  
813 <https://doi.org/10.1111/pan.12120>
- 814 Wang, E. T., Cody, N. A. L., Jog, S., Biancolella, M., Wang, T. T., Treacy, D. J., Luo, S.,  
815 Schroth, G. P., Housman, D. E., Reddy, S., Lécuyer, E., & Burge, C. B. (2012).

- 816 Transcriptome-wide regulation of pre-mRNA splicing and mRNA localization by  
817 muscleblind proteins. *Cell*, 150(4), 710–724.  
818 <https://doi.org/10.1016/j.cell.2012.06.041>
- 819 Wang, E. T., Treacy, D., Eichinger, K., Struck, A., Estabrook, J., Olafson, H., Wang, T.  
820 T., Bhatt, K., Westbrook, T., Sedehizadeh, S., Ward, A., Day, J., Brook, D.,  
821 Berglund, J. A., Cooper, T., Housman, D., Thornton, C., & Burge, C. (2019).  
822 Transcriptome alterations in myotonic dystrophy skeletal muscle and heart. *Human*  
823 *Molecular Genetics*, 28(8), 1312–1321. <https://doi.org/10.1093/hmg/ddy432>
- 824 Wheeler, T. M., & Thornton, C. A. (2007). Myotonic dystrophy: RNA-mediated muscle  
825 disease. *Current Opinion in Neurology*, 20(5), 572–576.  
826 <https://doi.org/10.1097/WCO.0b013e3282ef6064>
- 827 Xu, K., Deng, X. Y., Yue, Y., Guo, Z. M., Huang, B., Hong, X., Xiao, D., & Chen, X. G.  
828 (2005). Generation of the regulatory protein rtTA transgenic mice. *World Journal of*  
829 *Gastroenterology*, 11(19), 2885–2891. <https://doi.org/10.3748/wjg.v11.i19.2885>
- 830 Yum, K., Wang, E. T., & Kalsotra, A. (2017). Myotonic dystrophy: disease repeat range,  
831 penetrance, age of onset, and relationship between repeat size and phenotypes.  
832 *Current Opinion in Genetics & Development*, 44, 30–37.  
833 <https://doi.org/10.1016/j.gde.2017.01.007>
- 834

835

836 **Fig. 1: A murine model successfully recapitulates the molecular mechanism of DM1**  
837 **within hepatocytes**

838 A, Schematic of the bi-transgenic, hepatocyte specific, doxycycline (Dox)-inducible model used  
839 to induce expression of the toxic CUG960i RNA within the liver of mice. The toxic transcripts  
840 contain long (CUG) repeat stretches, which sequester RNA binding proteins including MBNL  
841 proteins. This model is referred to as the DM1 liver model. Feeding the mice Dox will cause the  
842 toxic RNA to be expressed within the hepatocytes of the mice. B, Experimental schematic of the  
843 Dox diet feeding protocol used induce DM1 within the livers of the subject mice. Mice are fed  
844 2g/kg Dox supplemented rodent diet until weaning on day 21. Mice are then switched to 0.1g/kg  
845 Dox supplemented diet or maintained on the 2g/kg Dox diet for a further 6 weeks. Glucose  
846 tolerance testing (GTT) occurs the week prior to sacking. C, Hybrid RNA fluorescent in-situ  
847 hybridization immuno-fluorescence (RNA FISH-IF) imaging of the toxic (CUG)<sub>n</sub> RNA (red) and  
848 Mbnl1 (green) foci within the nuclei (blue) of hepatocytes. D, Quantification of the number of  
849 CUG960i/Mbnl1 foci containing hepatocyte nuclei, as determined by RNA FISH-IF. DM1 liver  
850 mice fed 0.1g/kg Dox diet (n=7) are compared to mice either not Dox (No Dox) diet (n=5), or  
851 mice fed 0.1g/kg Dox for two months before being returned to Dox free diet for two weeks (2  
852 week recovery) (n=7) E, Distribution of the number of CUG960i/Mbnl1 foci per hepatocyte  
853 nucleus in mice fed 0.1 g/kg Dox diet for 1 month after weaning (n=7). F, Quantitative-PCR  
854 analysis of the toxic CUG960i RNA within the hepatocytes and whole liver of the DM1 liver mice  
855 and respective controls (n= 5 for the ApoE-rtTA controls, 20 for the DM1 liver mice, 9 for the  
856 DM1 mice that were not fed Dox (No-Dox), and 7 for the 2 week recovery mice).

857

858 **Fig. 2: DM1 causes global transcriptomic changes within the hepatocytes**

859 A, Reverse transcription-PCR (RT-PCR) splicing gel analysis of selected Mbnl1 targets. Bands  
860 represent either the presence or absence of the target exon, the band corresponding to (+)  
861 indicates exon inclusion and (-) indicates exon exclusion. Targets are listed above each image,  
862 with percent “spliced in” (PSI) listed below. B, Overlap of transcripts that undergo either  
863 alternative splicing, alternative poly adenylation (APA) or changes in expression upon induction  
864 of DM1 within hepatocytes. C, Volcano plot showing changes in mRNA abundance from RNA-  
865 seq (n = 3 animals per condition) D, Violin plots showing the inclusion levels of alternative  
866 splicing events that fall into the categories of mutually exclusive splicing (MXE), alternative 3' or  
867 5' splicing (A3SS or A5SS), alternative cassette exon splicing (ASE), or retained intron (RI)  
868 events, as taken from the RNA-seq data. E, Comparison of exon inclusion results for 30 events.  
869 Change in PSI as determined by RT-PCR splice assays is plotted on the Y axis and change in  
870 PSI as determined by RNA Seq analysis is plotted on the x axis (n=3 animals per condition). F,  
871 Gene tracks of representative genes showing alternative exon inclusion levels across DM1 liver  
872 hepatocytes, *Mbnl1*<sup>ΔE3/ΔE3</sup> (KO) or wild type animals. G, Pie chart of genes undergoing  
873 alternative splicing when compared to control animals. Genes are divided into categories  
874 depending on if they have been shown to be regulated by DM1 alone, Mbnl1 or changing during  
875 maturation in the liver. H, Pie chart of genes undergoing alternative expression when compared  
876 to control animals. Genes are divided into categories depending on if they have been shown to  
877 be regulated by DM1 alone, Mbnl1 or changing during maturation of the liver. I, Gene ontology  
878 diagram of selected processes belonging to genes with alternative mRNA processing events in  
879 the DM1 liver model. J. Gene ontology diagram of selected processes belonging to genes  
880 undergoing differential expression in the DM1 liver model

881

882 **Fig. 3: DM1 causes lipid accumulation and injury within the liver**

883 A, Blood glucose levels of male mice, measured just prior to sacrifice after 4 hours of fasting (n=  
884 15 for male ApoE-rtTA control mice and 16 for DM1 liver male mice). B, Glucose tolerance  
885 testing (GTT) curves of male mice, showing blood glucose levels rise and fall after IP injection of  
886 glucose. GTT was performed the week preceding harvest after a 24hr fast (n= 8 for male ApoE-  
887 rtTA control mice and 16 for DM1 liver male mice). C, Representative histological images of  
888 ApoE-rtTA control and DM1 Mice. The top two rows are representative hematoxylin and eosin  
889 (H&E) images. Instances of inflammation and necrosis are circled in the DM1 liver H&E images.  
890 The bottom row are representative Oil Red-O images. Oil Red-O (**Red**) stains lipid droplets;  
891 hematoxylin (**blue**) stains the nuclei. D, Hepatosomatic index for DM1 mice and respective  
892 ApoE-rtTA control mice (n= 16 for ApoE-rtTA mice and 32 for DM1 liver mice). E, Quantification  
893 of Oil Red O signal, relative to the signal from hematoxylin stained nuclei. Oil Red O stains lipid  
894 droplets within tissues, allowing for a relative determination of lipid accumulation when  
895 compared to number of nuclei present.

896 **Fig. 4: DM1 increases diet induced NAFLD severity**

897 A, A schematic of the feeding protocol used for the western diet fed mice. Mice are fed 2g/kg  
898 Dox supplemented rodent diet at birth, as before, but at weaning, mice are switched to a 0.1g/kg  
899 Dox supplemented high fat, high sugar “western” diet. Mice are maintained on the western diet  
900 for 8 weeks until sacrifice. B, GTT curves. GTT was performed twice during the two weeks  
901 preceding harvest, with a 6 day resting period between each test (n= 12 for male ApoE-rtTA  
902 control mice and 9 for DM1 liver male mice, and 5 for DM1) C, Blood glucose levels of mice,  
903 measured just prior to sacrifice after 4 hours of fasting (n= 22 for male ApoE-rtTA control mice  
904 and 10 for DM1 liver male mice). D, Representative images of livers collected from ApoE-rtTA  
905 mice (left) and DM1 Liver mice (right) fed western diet. E, Representative histological images of  
906 ApoE-rtTA control and DM1 Mice. The top row are representative hematoxylin and eosin (H&E)  
907 images. Instances of inflammation and necrosis are circled in the DM1 liver H&E images. The  
908 bottom two rows are representative Oil Red-O images. Oil Red-O (Red) stains lipid droplets;  
909 hematoxylin (blue) stains the nuclei. F, Analysis of the extractable triglycerides within the livers  
910 of mice fed the basal 0.1g Dox supplemented diet and the western 0.1g Dox supplemented diet  
911 (n= 21 for ApoE-rtTA mice and 14 for DM1 liver mice). G, Hepatosomatic index for DM1 mice  
912 and respective ApoE-rtTA control mice (n= 34 for ApoE-rtTA mice and 19 for DM1 liver mice).

913

914 **Figure 5: DM1 liver model mice demonstrate decreased drug metabolism.**

915 A, a schematic of the zoxazolamine testing procedure utilized. Mice are given 120 mg of  
916 zoxazolamine per kg of body weight via IP injection. Once mice cease movement and are  
917 unable to self-right, mice are placed on their back on a heated pad, and time is measured until  
918 the mice can successfully right themselves 3 times. Zoxazolamine testing was always  
919 performed in batches, containing both age matched and sex matched controls along DM1 liver  
920 mice. B, the average self-righting time of zoxazolamine injected mice. The time is normalized,  
921 with the average control male mouse self-right time being set to 100. C, a schematic outlining  
922 APAP drug metabolism within hepatocytes. D, the mortality rate of APAP insult experiments 8  
923 hours post 350 mg/kg APAP injection. E, representative images of the livers of male mice which  
924 survived for 24 hours post 350 mg/kg APAP injection. F, representative H&E images of livers  
925 from male mice surviving 24 hours post 350 mg/kg APAP injection.

926

# FIGURE 1

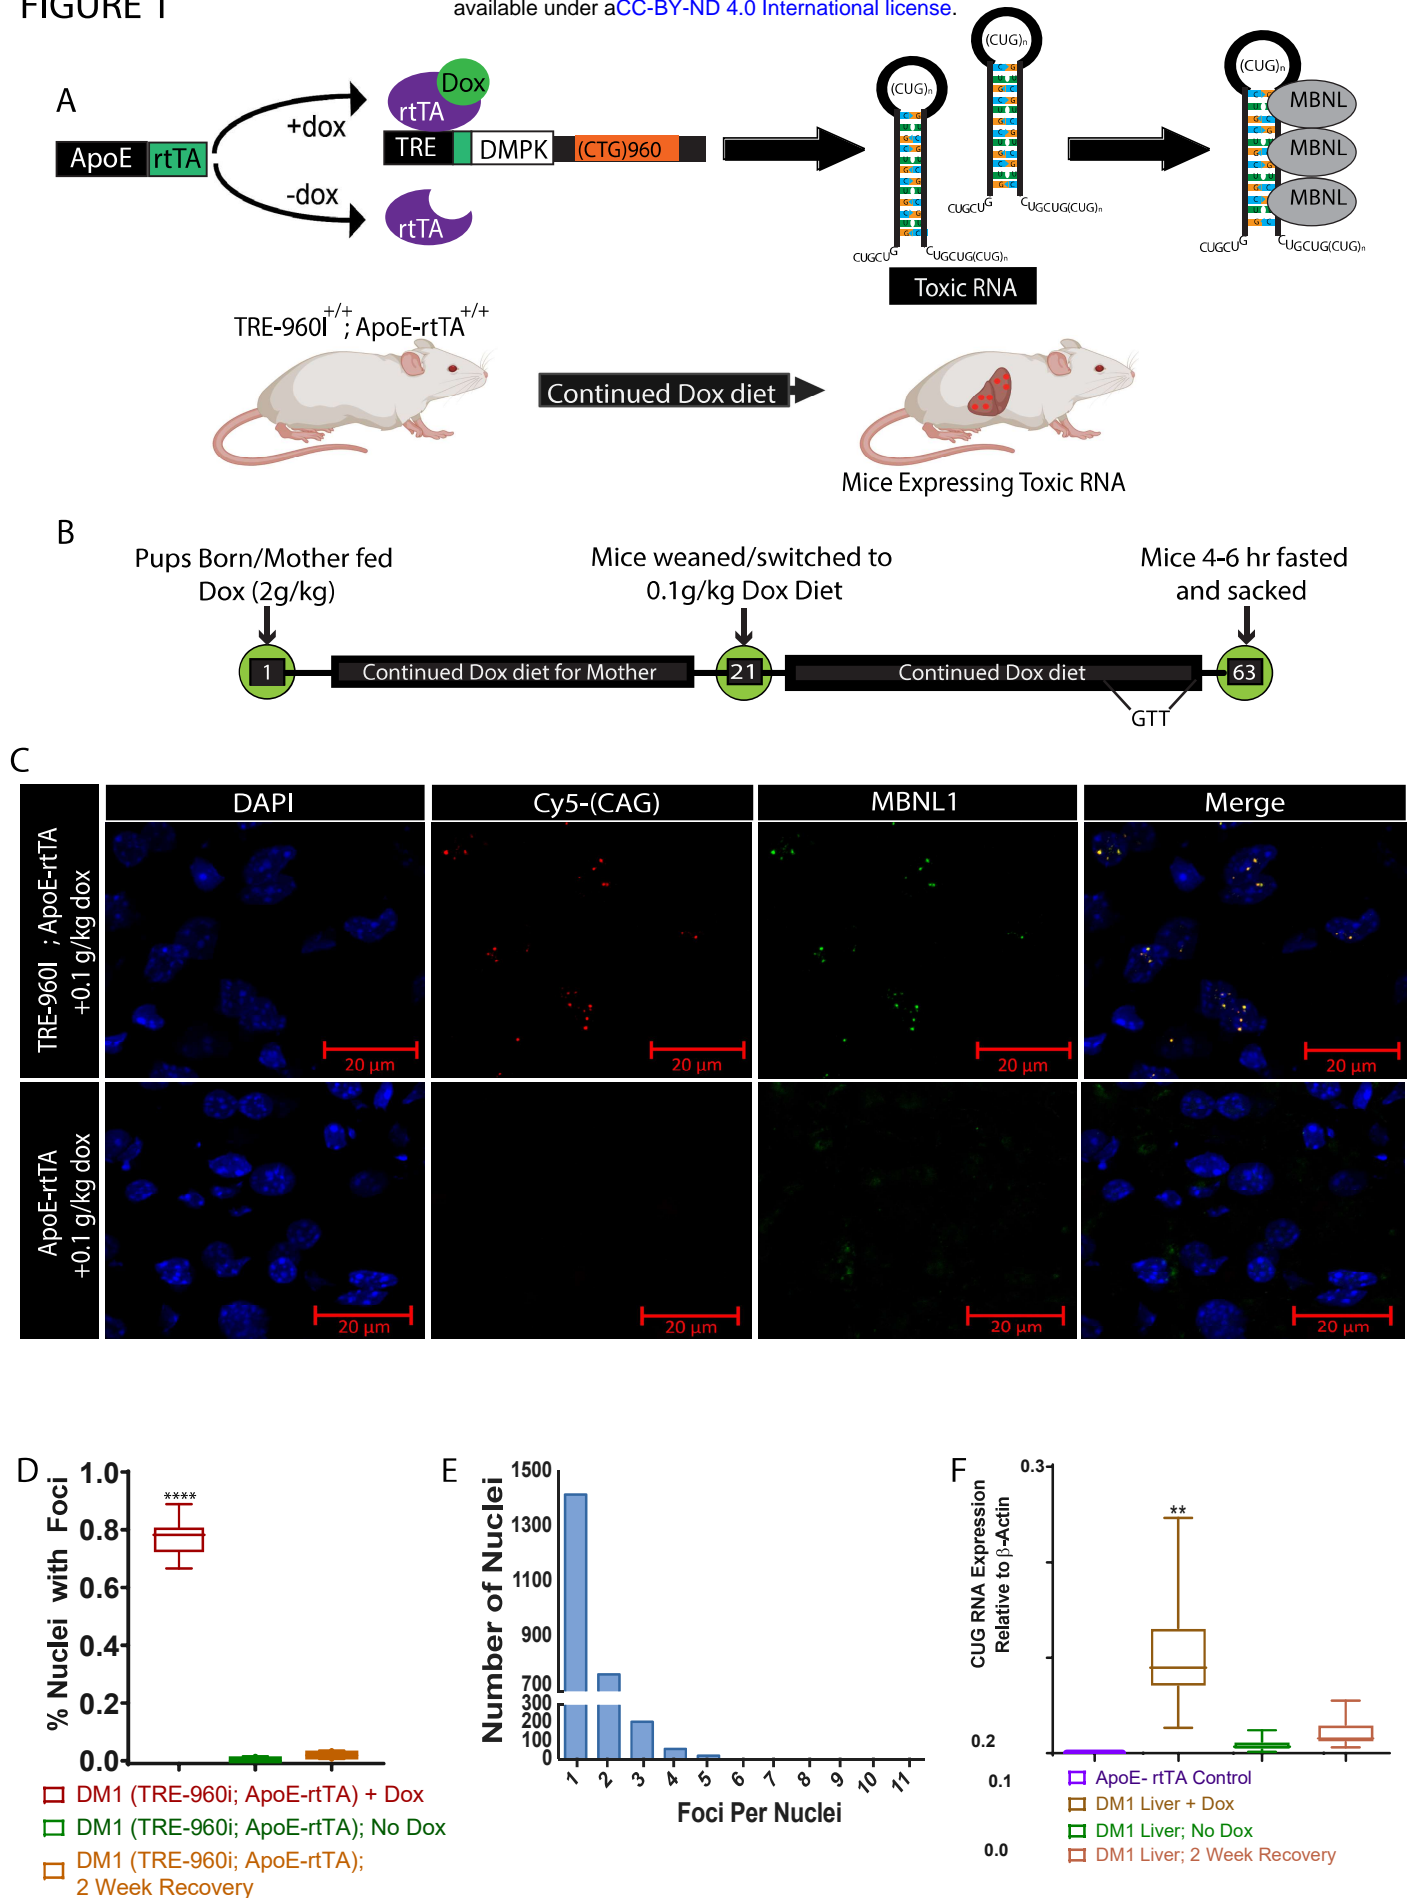



## FIGURE 2

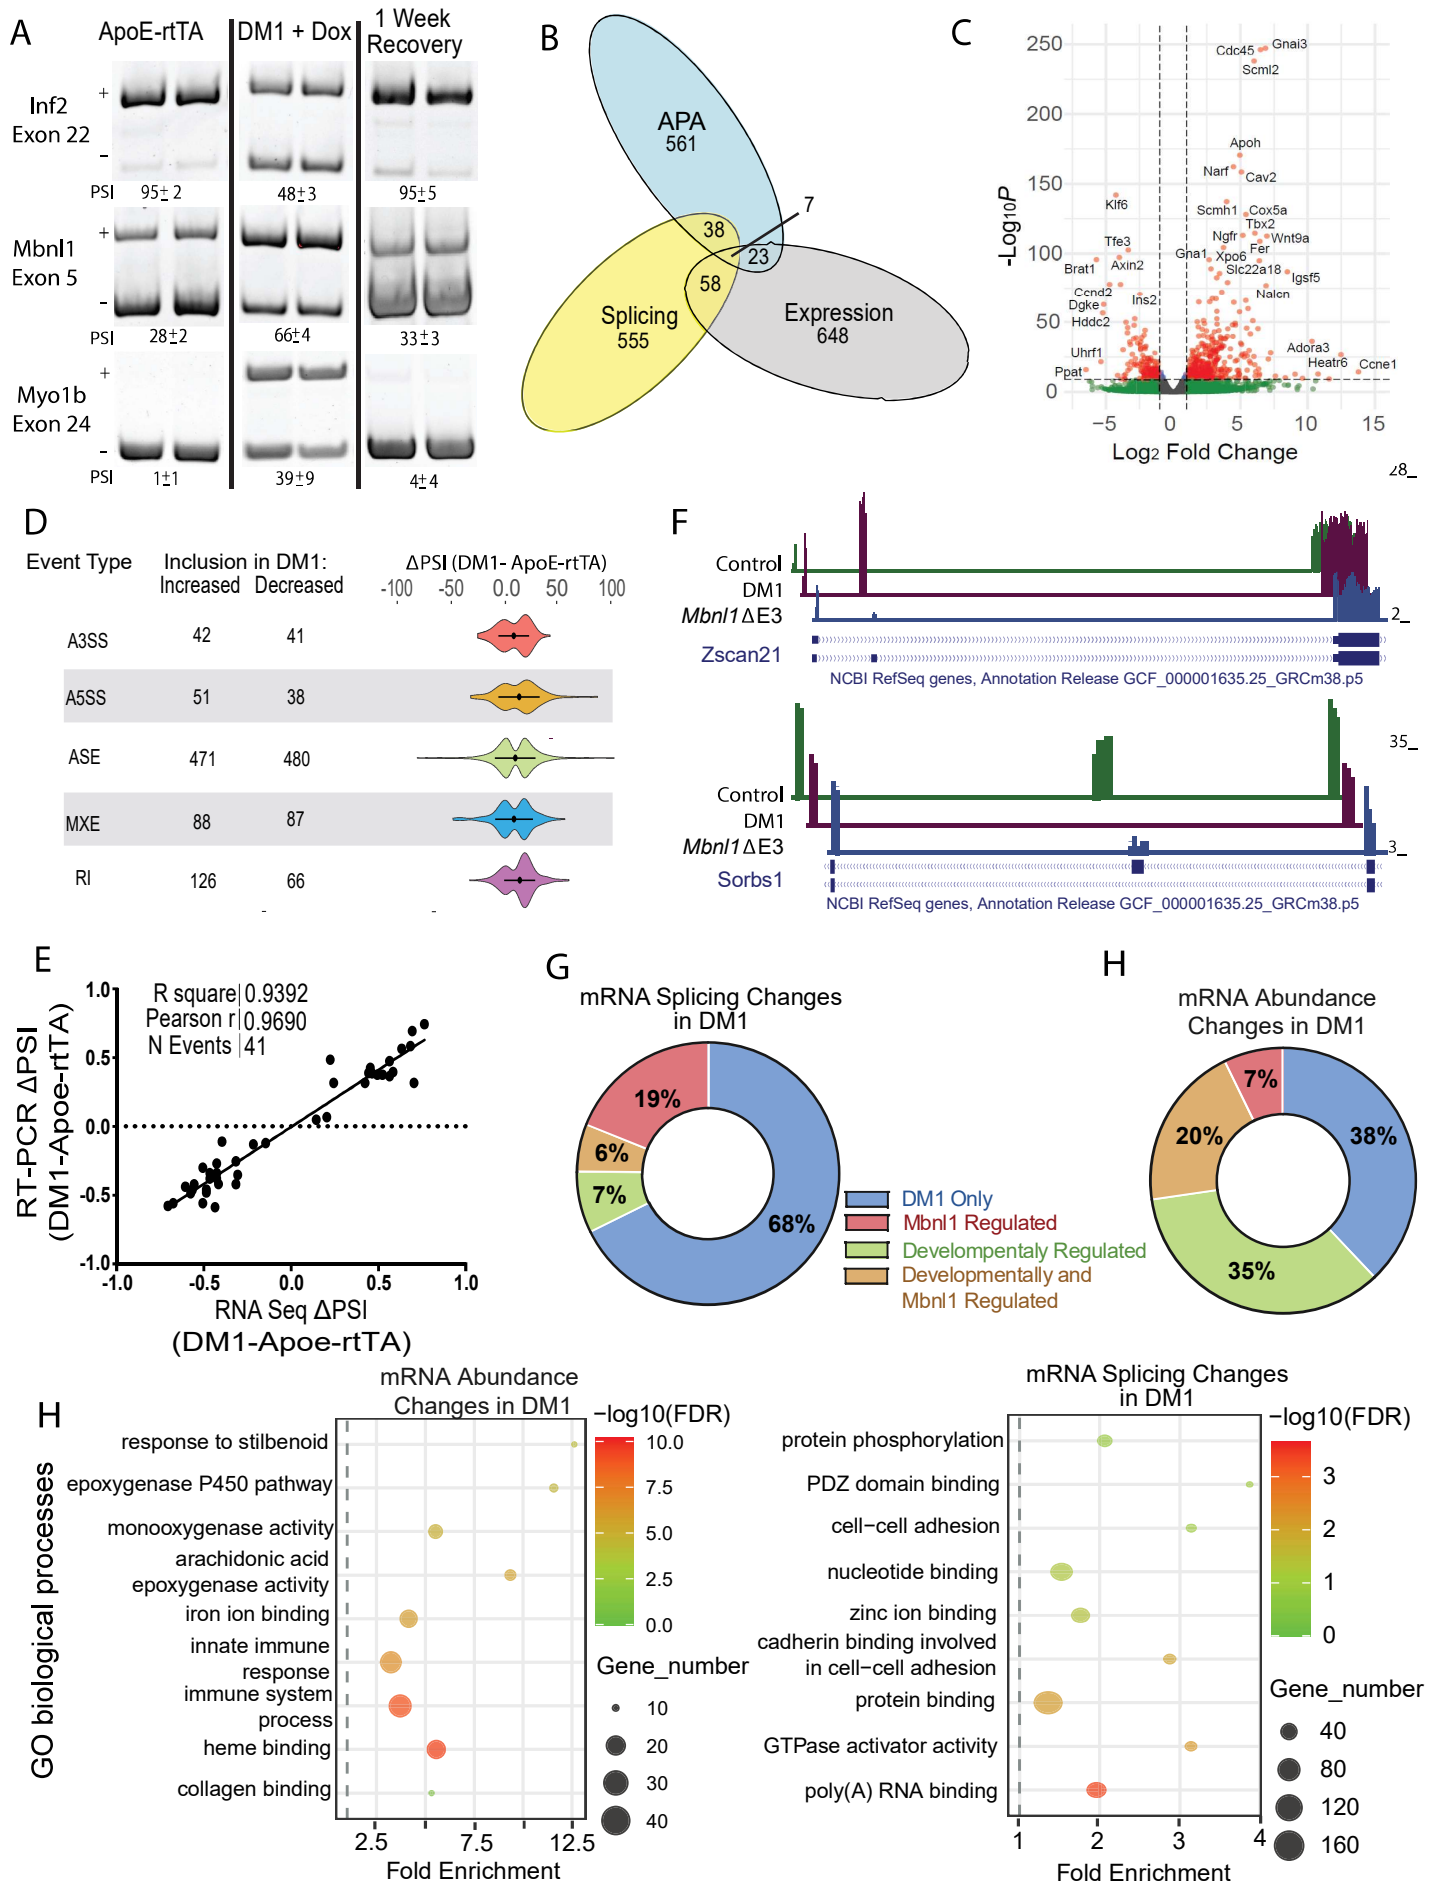

### FIGURE 3

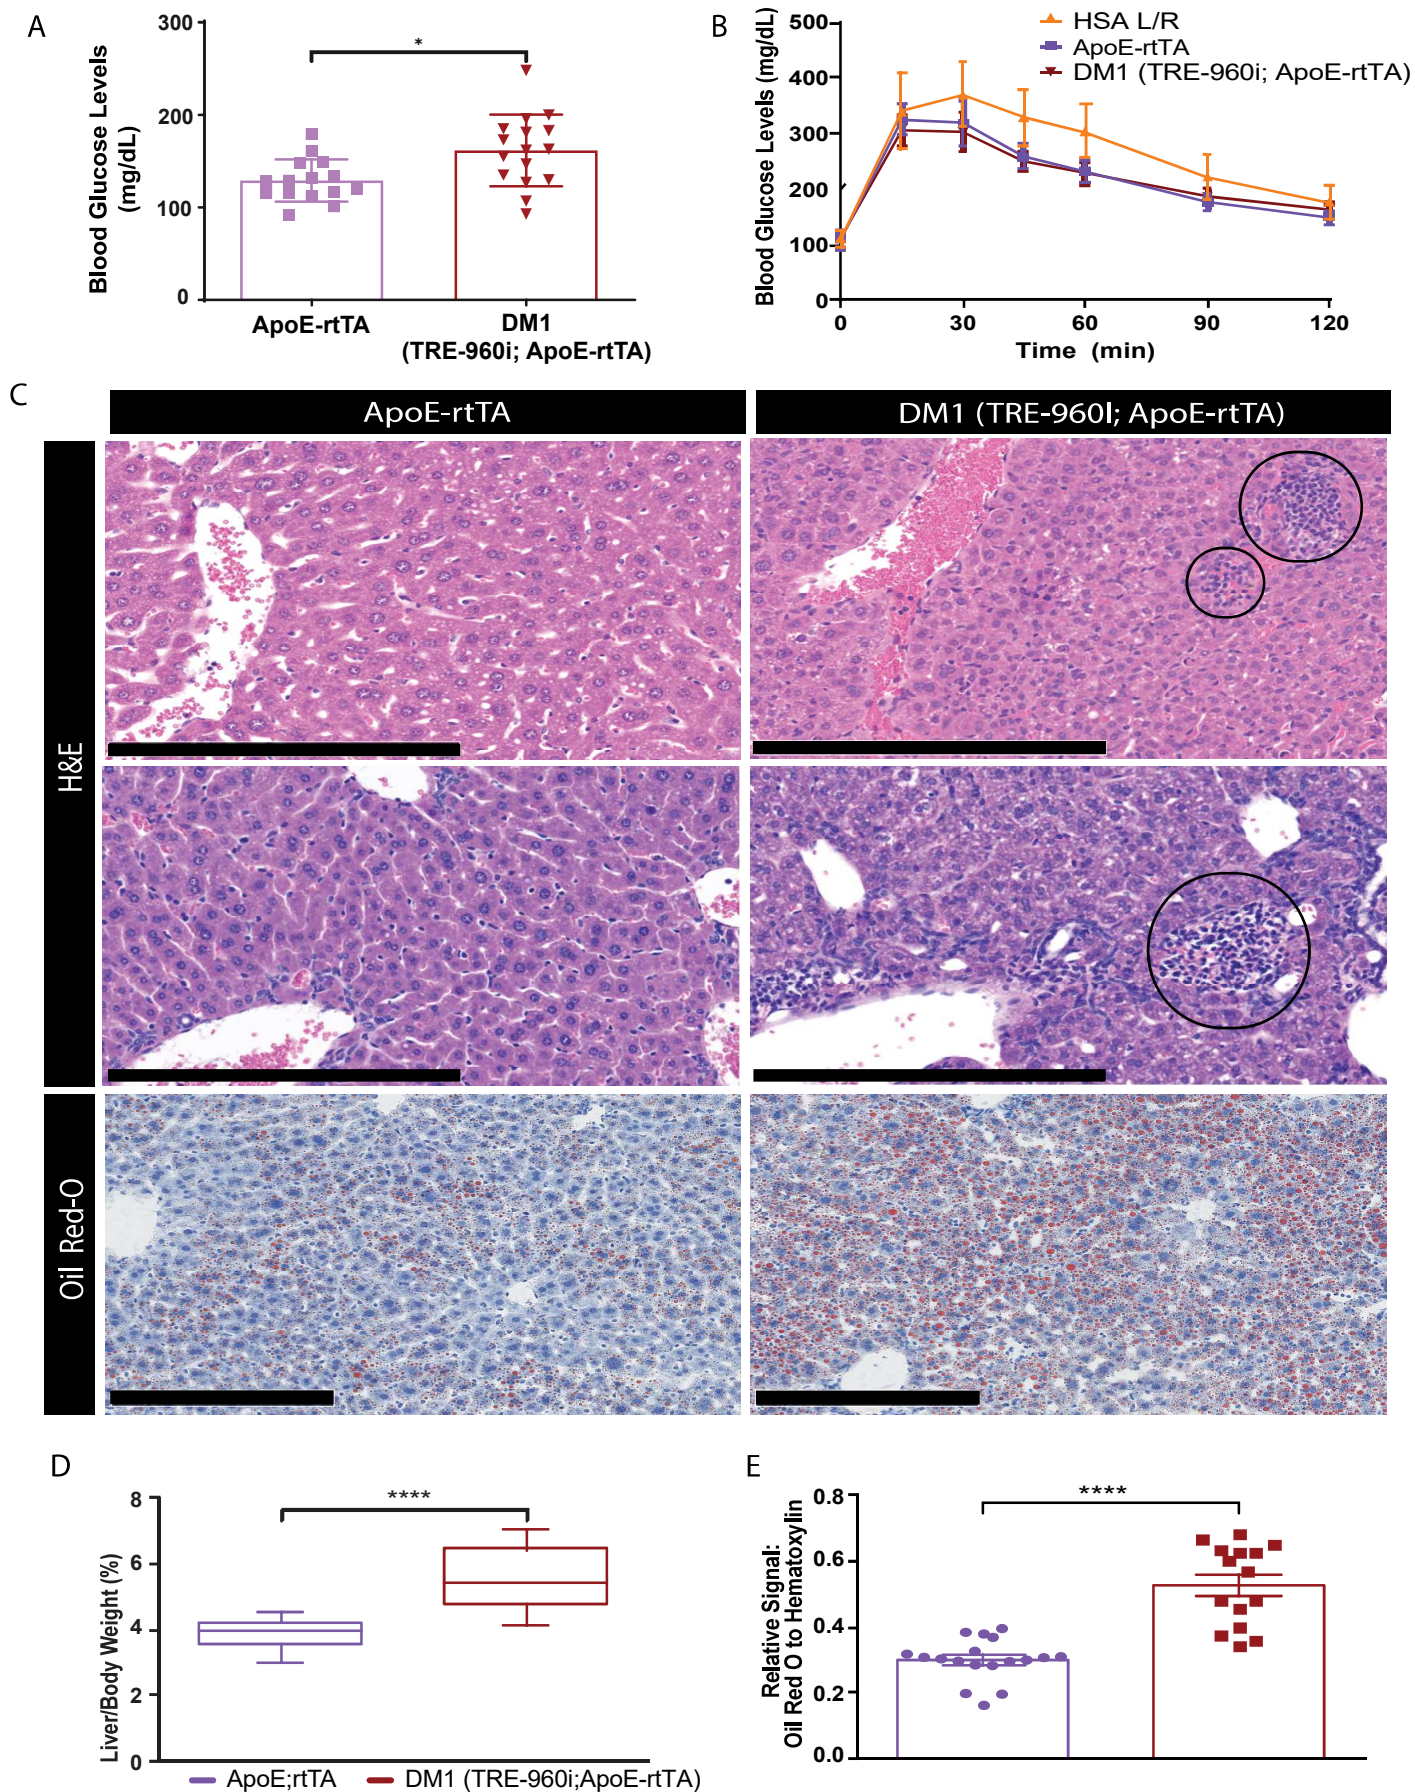



## FIGURE 4

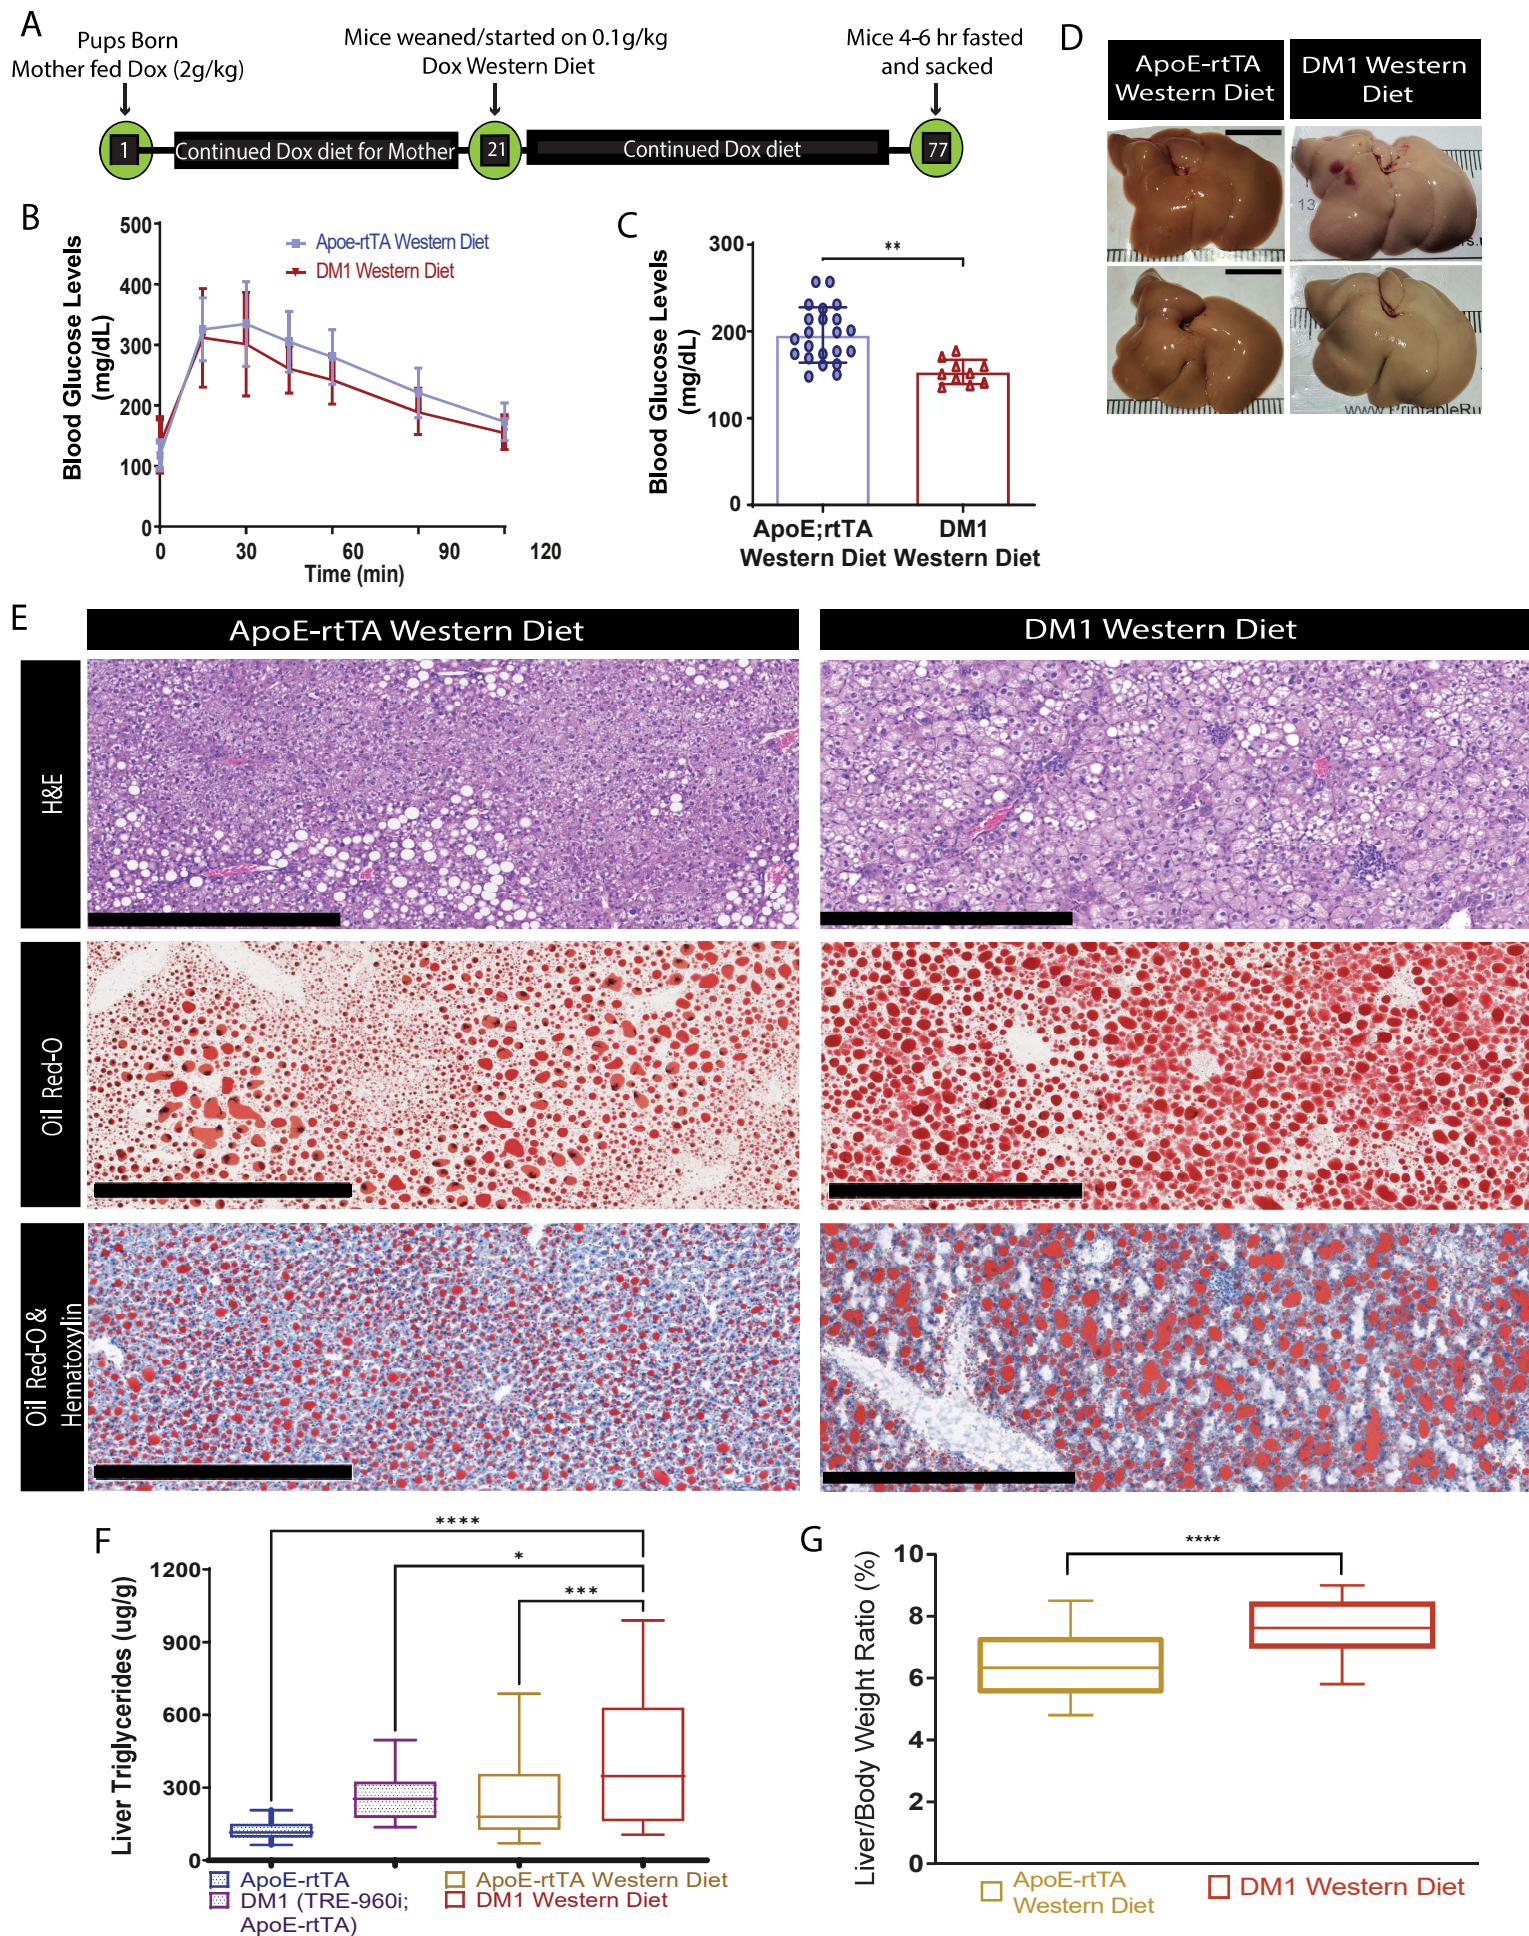



## FIGURE 5

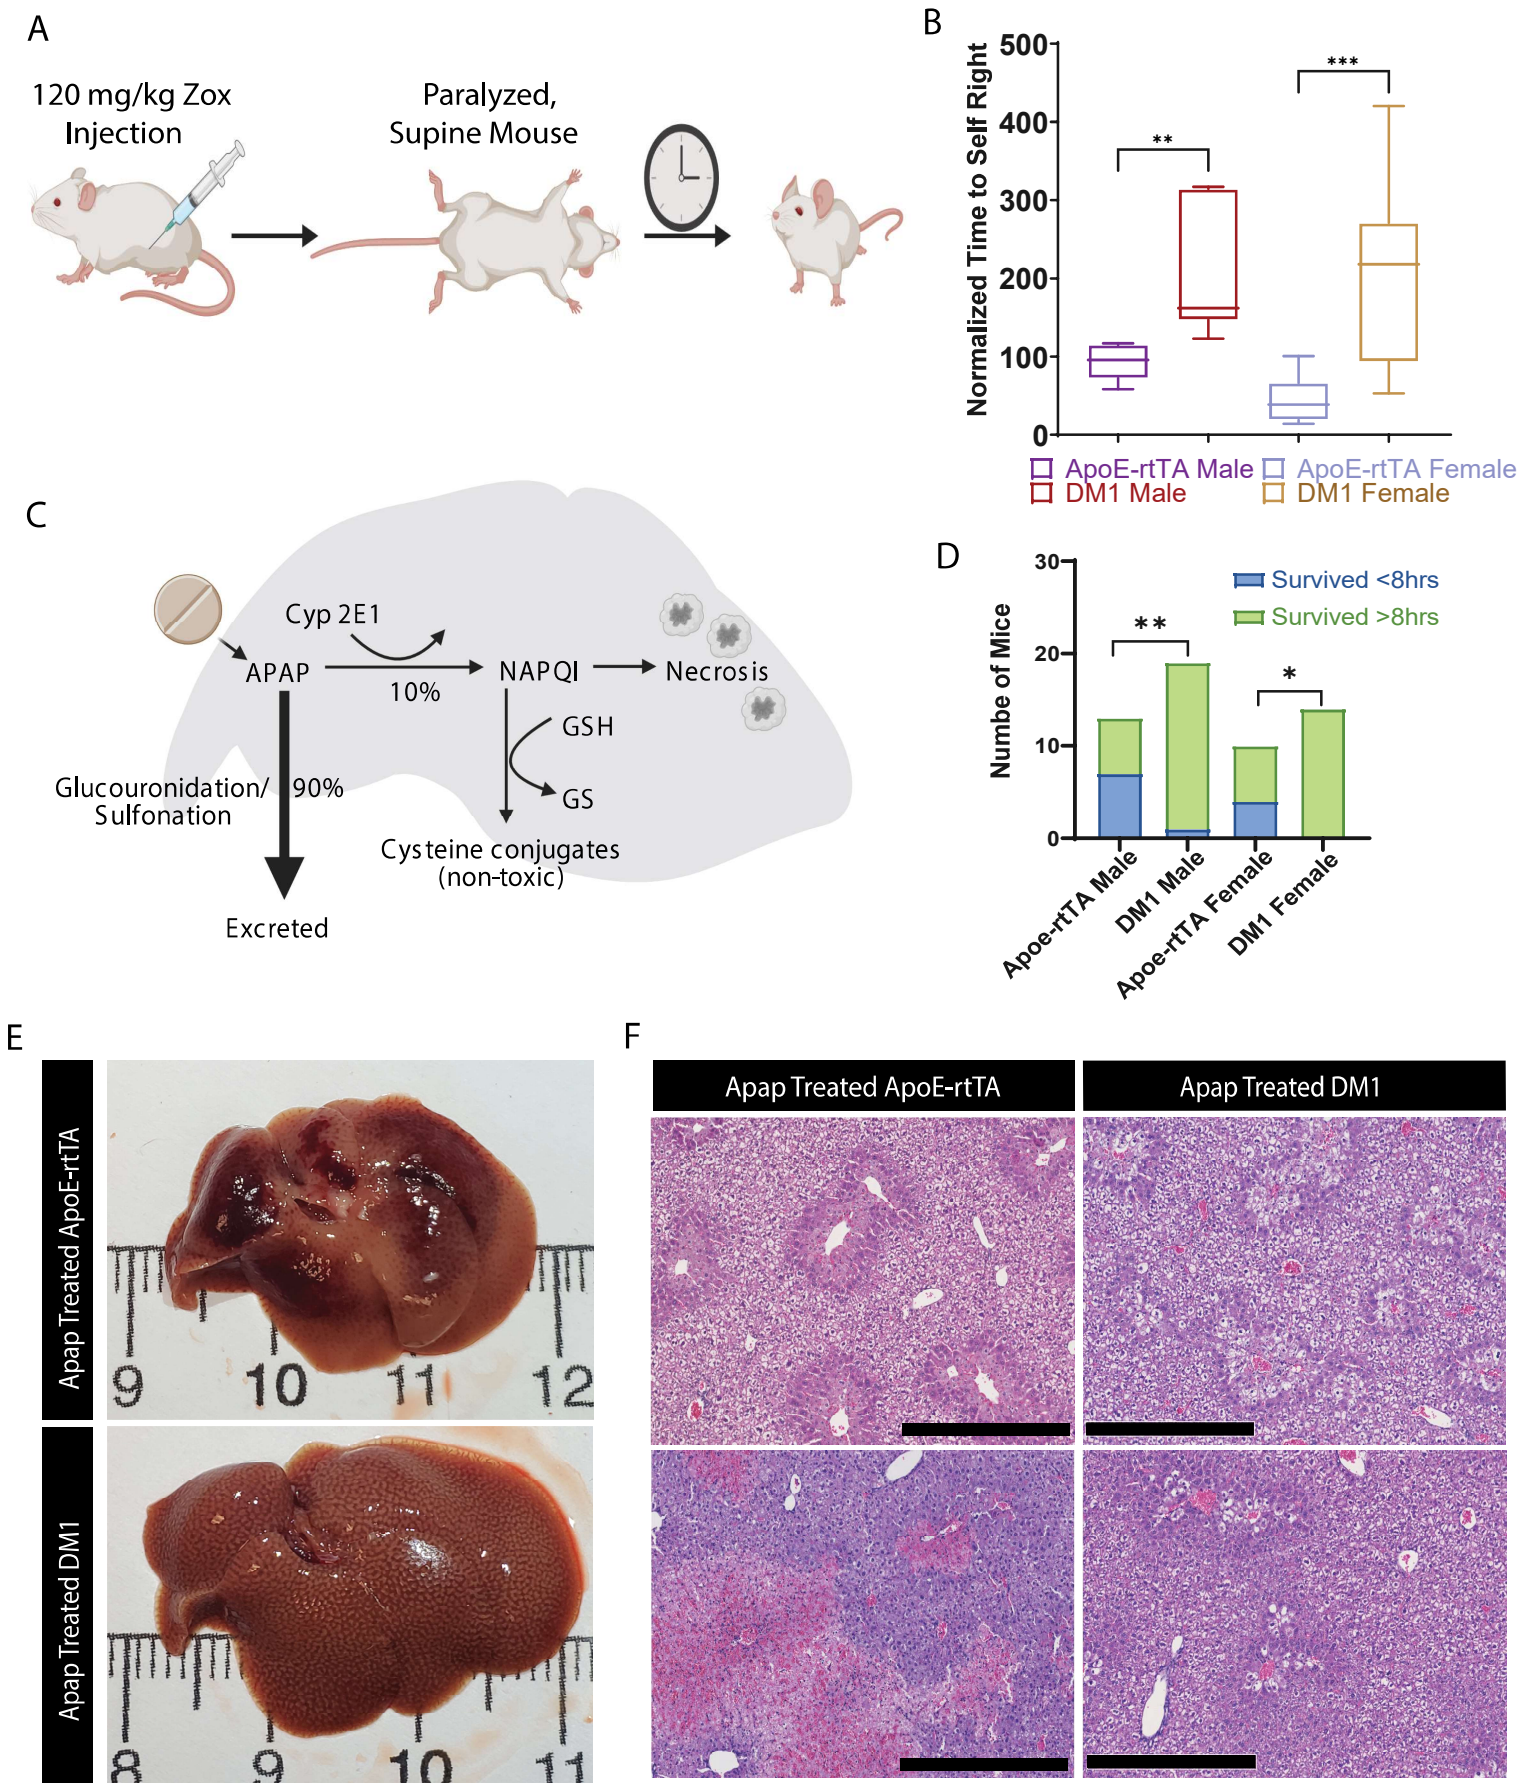

927 Table 1: Gene ontology clusters identified by DAVID Functional Annotation within DM1 induced  
 928 hepatocyte splicing changes

929

| <i>Cluster Name</i>                        | <b>Example Ontologies</b>                  | <b>Total Genes</b> | <b>Enrichment</b> | <b>P-Value</b> |
|--------------------------------------------|--------------------------------------------|--------------------|-------------------|----------------|
|                                            | <b>Effected</b>                            | <b>Effected</b>    | <b>Score</b>      |                |
| <i>Zinc Finger Proteins</i>                |                                            |                    | 3.375             |                |
|                                            | IPR001965: Zinc Finger, PHD-Type           | 12                 |                   | 6.14E-5        |
| <i>Kinase and Phosphorylation activity</i> |                                            |                    | 3.166             |                |
|                                            | GO:0000166: Nucleotide Binding             | 92                 |                   | 3.63E-5        |
|                                            | GO:0006468: Protein Phosphorylation        | 36                 |                   | 7.77E-5        |
|                                            | IPR008271: Serine/threonine-Protein Kinase | 23                 |                   | 2.89E-4        |

930

931

932 Table 2: Gene ontology clusters identified by DAVID Functional Annotation within DM1 induced  
 933 hepatocyte transcript abundance changes

|                                 | <b>Cluster Name</b>                       | <b>Example Ontologies</b>                        | <b>Total Genes</b> | <b>Enrichment</b> | <b>P-Value</b> |
|---------------------------------|-------------------------------------------|--------------------------------------------------|--------------------|-------------------|----------------|
|                                 |                                           | <b>Effected</b>                                  | <b>Effected</b>    | <b>Score</b>      |                |
| <i>Increasing<br/>Abundance</i> |                                           |                                                  |                    |                   |                |
|                                 | Cytochrome<br>p450                        |                                                  |                    | 6.286             |                |
|                                 |                                           | GO:0020037: Heme<br>Binding                      | 31                 |                   | 3.95E-14       |
|                                 |                                           | IPR002401: Cytochrome<br>P450, E-class, Group 1  | 18                 |                   | 3.29E-10       |
|                                 |                                           | GO:008392: Arachidonic<br>Acid metabolism        | 18                 |                   | 1.55E-9        |
|                                 | Kinase and<br>Phosphorylation<br>activity |                                                  |                    | 2.97              |                |
|                                 |                                           | GO:0006468: Protein<br>Phosphorylation           | 40                 |                   | 7.30E-6        |
|                                 |                                           | IPR001245:<br>Serine/threonine-Protein<br>Kinase | 13                 |                   | 9.87E-4        |
|                                 | SMAD Protein<br>Pathways                  | GO:060389-SMAD protein<br>phosphorylation        | 5                  | 2.89              | 5.64E-4        |

|                                 |                                  |                                                     |    |      |         |
|---------------------------------|----------------------------------|-----------------------------------------------------|----|------|---------|
| <i>Decreasing<br/>Abundance</i> | Hormone<br>Receptor<br>Signaling |                                                     |    | 2.89 |         |
|                                 |                                  | GO:0003707: Steroid<br>Hormone Receptor<br>Activity | 9  |      | 3.69E-4 |
|                                 |                                  | IPR000536: Nuclear<br>hormone receptor              | 8  |      | 6.03E-4 |
|                                 | C-type Lectin<br>Domains         | IPR016186:C-type lectin-<br>like                    | 13 | 2.48 | 8.69E-4 |
|                                 |                                  |                                                     |    |      |         |
|                                 | Hormone<br>Biosynthesis          | mmu00830: Retinol<br>metabolism                     | 7  | 2.48 | 1.69E-3 |
|                                 | Regulation of<br>Development     |                                                     |    | 2.41 |         |
|                                 |                                  | mmu04950: Maturity onset<br>diabetes of the young   | 6  |      | 3.91E-5 |
|                                 |                                  | GO:0001889~liver<br>development                     | 5  |      | 1.49E-3 |

934

935

936 **Supplemental Figure 1: Ancillary data and liver images for 0.1g dox fed mice**

937 A, Quantification of the number of CUG960i/Mbnl1 foci containing hepatocyte nuclei, as  
938 determined by RNA FISH-IF. Mice fed 2g/kg Dox diet (n=7) are compared to mice fed 0.1 g/kg  
939 Dox diet (n=7) B, Quantative-PCR analysis of the toxic CUG960i RNA within the hepatocytes  
940 and whole liver of the DM1 liver mice and respective controls (n=3 for the DM1 hepatocytes, 20  
941 for the DM1 whole livers). C, Pie chart showing the percentage of alternative splicing events that  
942 fall into the categories of mutually exclusive splicing (MXE), alternative 3' or 5' splicing (A3SS or  
943 A5SS), alternative cassette exon splicing (ASE), or retained intron (RI) events, as taken from  
944 the RNA-seq data D, RT-PCR splice assay analysis of selected Mbnl1 targets. Bands represent  
945 either the presence or absence of the target exon, the band corresponding to (+) indicates exon  
946 inclusion and (-) indicates exon exclusion. Targets are listed above each image, with percent  
947 "spliced in" (PSI) listed below E, Quantification of the PSI of a variety of events changing in  
948 either *Mbnl1*<sup>ΔE3/ΔE3</sup> or DM1 liver mice or both, compared to their respective controls (n=3) F,  
949 Venn Diagram comparing mRNA differentially expressed in either the DM1 liver model or the  
950 *Mbnl1*<sup>ΔE3/ΔE3</sup> model when compared to controls. G, Venn Diagram comparing alternative mRNA  
951 processing events occurring in either the DM1 liver model or the *Mbnl1*<sup>ΔE3/ΔE3</sup> model when  
952 compared to controls. H, Western blot showing an increase of Mbnl2 protein within the  
953 *Mbnl1*<sup>ΔE3/ΔE3</sup> mice.

954



955 **Supplemental Figure 2: Ancillary data and liver images for basal dox fed mice**

956 A, Blood glucose levels of female mice, measured just prior to sacrifice after 4 hours of fasting  
957 (n= 15 for female ApoE-rtTA control mice and 13 for DM1 liver female mice). B, Glucose  
958 tolerance testing (GTT) curves of female mice, showing blood glucose levels rise and fall after  
959 IP injection of glucose. GTT was performed the week preceding harvest after a 24hr fast (n= 7  
960 for female ApoE-rtTA control mice and 17 for DM1 liver female mice). C, Mean body masses of  
961 mice diet at sacrifice (n= 9 for male ApoE-rtTA control mice, 5 for female ApoE-rtTA control  
962 mice, 9 for DM1 male mice fed w/o Dox, 5 for DM1 liver female mice fed w/o Dox, 10 for DM1  
963 liver male mice, and 9 for DM1 liver female mice). D, Representative histological images of HSA  
964 L/R mice livers. The top row is a representative Oil Red-O image. Oil Red-O (Red) stains lipid  
965 droplets; hematoxylin (blue) stains the nuclei. The bottom row is a representative hematoxylin  
966 and eosin (H&E) image. E, Mean body masses of mice fed western diet at sacrifice (n= 17 for  
967 male and female ApoE-rtTA control mice, 10 for DM1 liver male mice, and 9 for DM1 liver  
968 female mice).

969

970 **Supplemental Tables**

971 **Supplemental Table 1.** A table showing the qPCR forwards and reverse primers.

| Gene           | Forwards Primer      | Reverse Primer       |
|----------------|----------------------|----------------------|
| $\beta$ -Actin | TTGAATGGCAAGGTGCTGGA | TACGACCAGAGGCATACA   |
| TRE-960i       | GGGCCGTCCGTGTTCC     | GGGCGTCATGCACAAGAAAG |

972

973 **Supplemental Table 2.** A table of showing the forwards and reverse primers for each splicing

974 event.

| Gene   | Forwards Primer             | Reverse Primer         |
|--------|-----------------------------|------------------------|
| Inf2   | GGATGAGGATTGAGAGGACA        | GAGCACTCACTTGGCTTTGG   |
| Mbn1   | GCTGCCCAATACCAGGTCAAC       | TGGTGGGAGAAATGCTGTATGC |
| Synj2  | TTGTCCATGAGTGCCAGAAG        | GAGCTCGGTGGAGACAACCTC  |
| Sorbs1 | TCAGAGTCACCAAGACATTTTATAACC | ATTGGCTGGAGCAGGTCT     |
| Myo1b  | ACAAAGCGGTACCAGCAGA         | TGCGTACCTTCAGTCCAAGC   |
| Mbn2   | ATTTTCACCCTGCTGGACCAC       | TTTGGTAAGGGATGAAGACCA  |
| Git2   | GATCAGGCCAGAGCCATAC         | AGGGTCACAGGCAGTGTTGT   |

975

976

SUPPLEMENTAL FIGURE 1

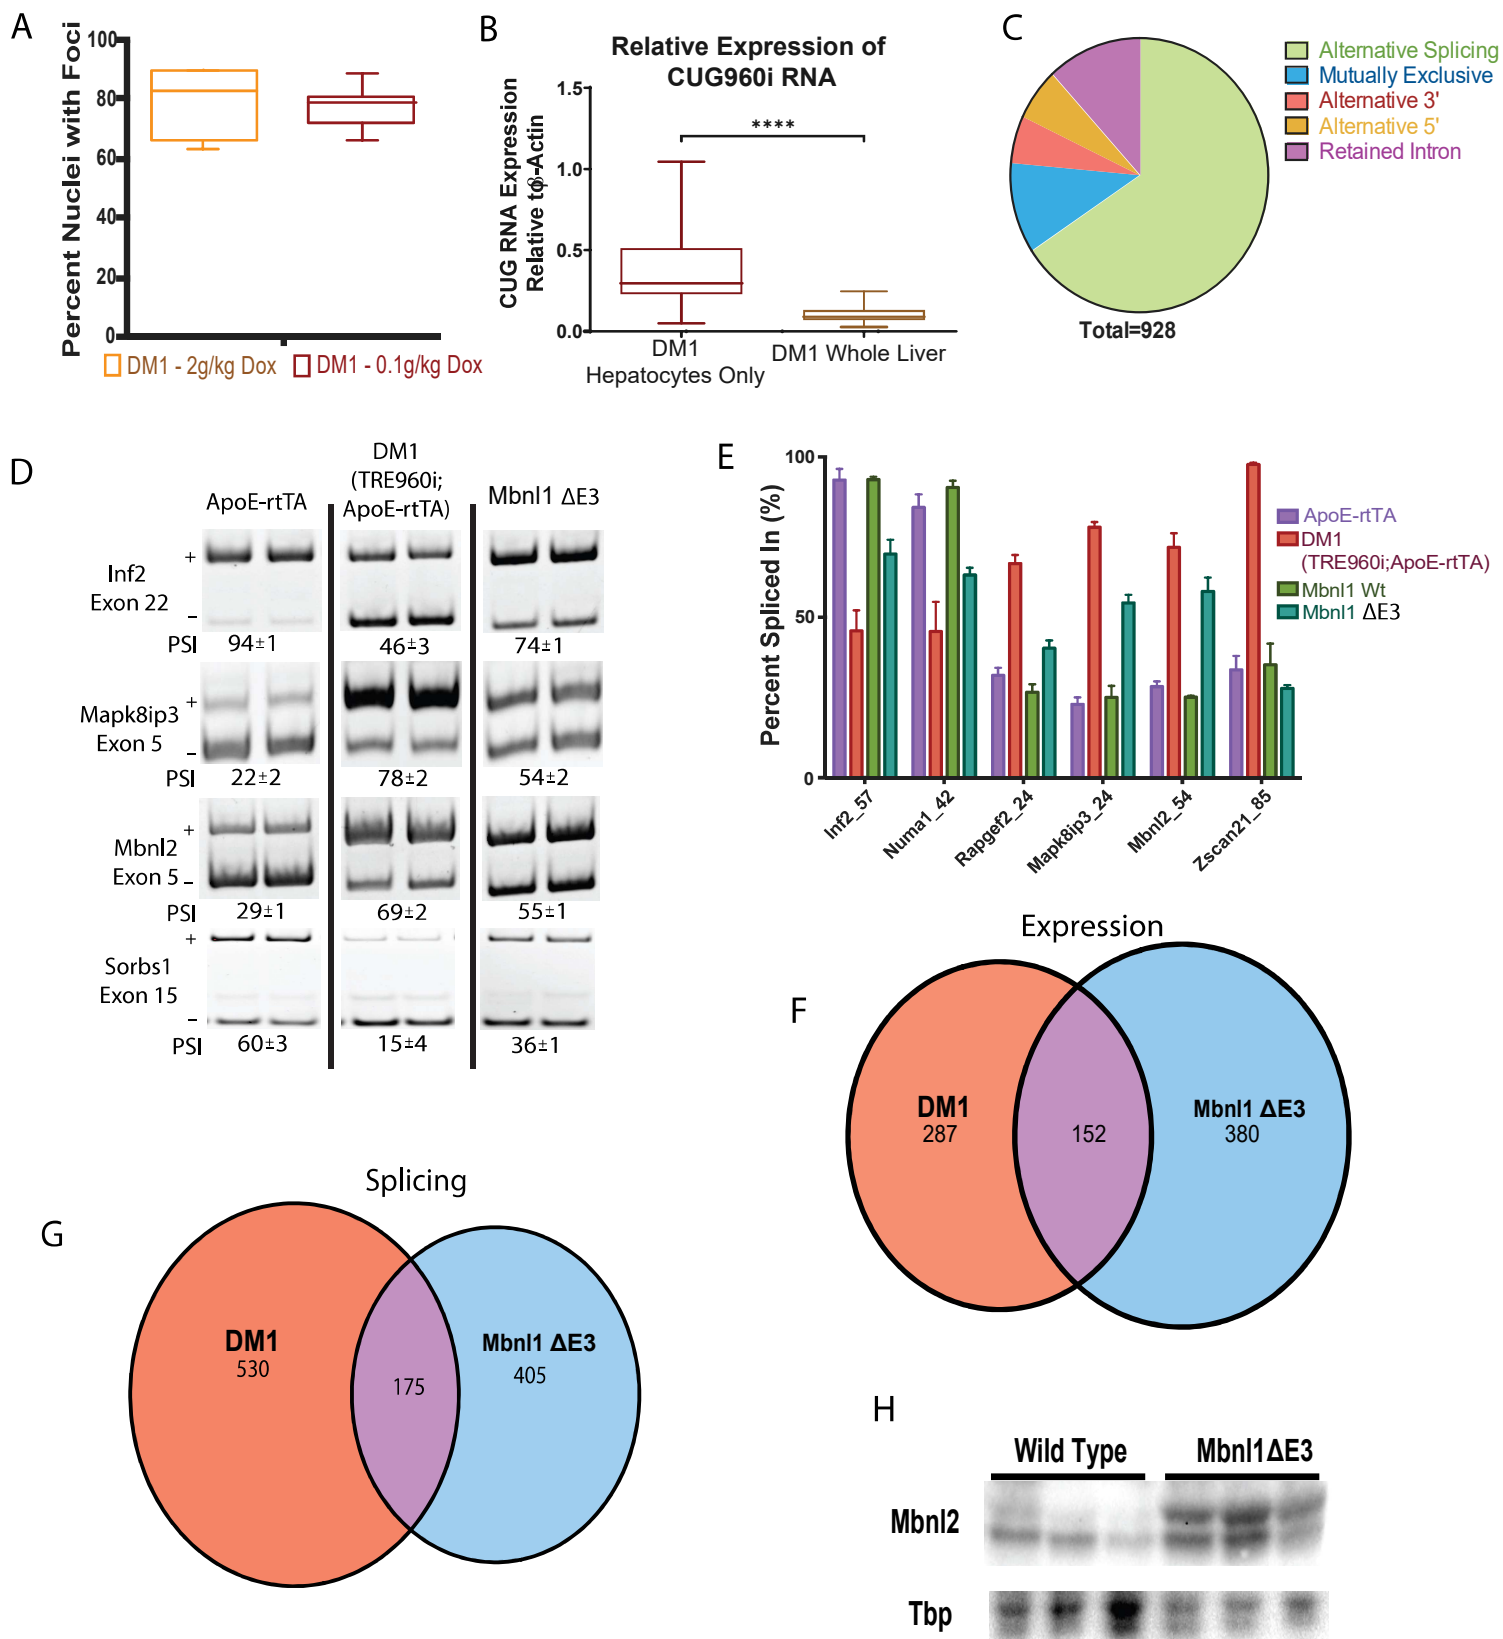

## SUPPLEMENTAL FIGURE 2

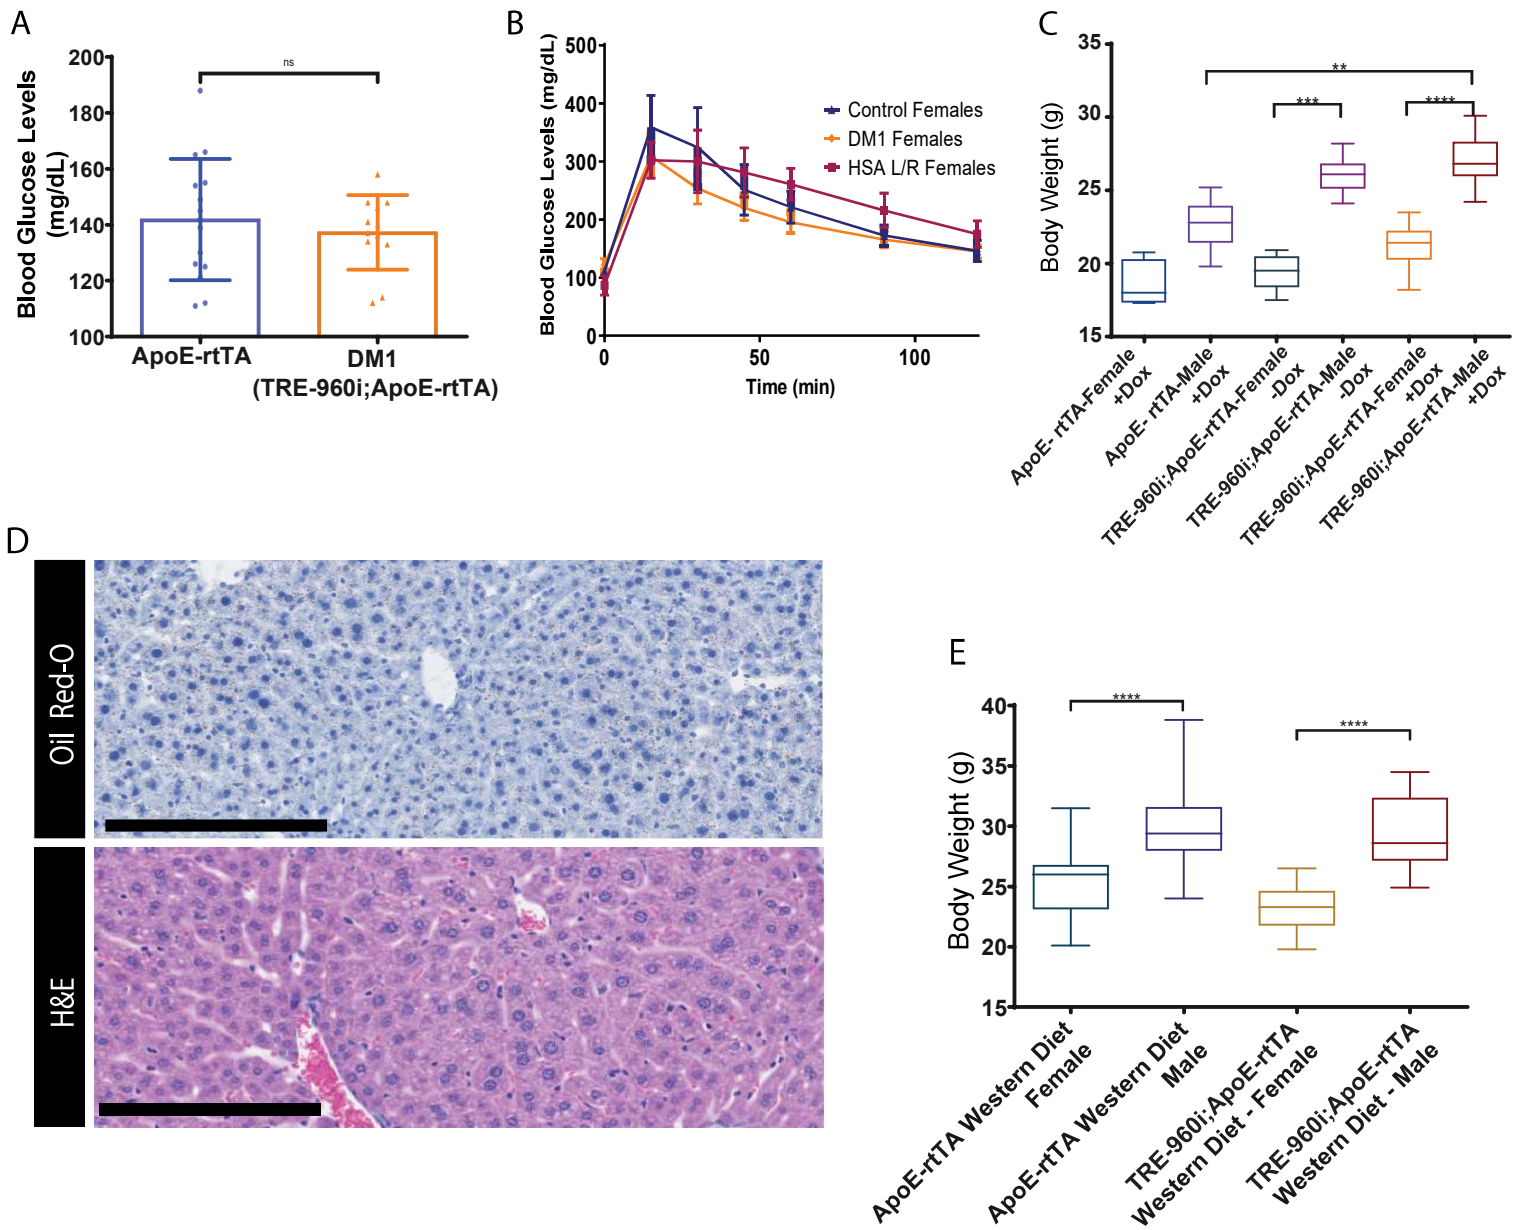

Source: https://www.biorxiv.org/content/10.1101/2021.04.06.438688v1.full.pdf
